# Supplementary material for: Intramolecular electron transfer in Cu(ii) complexes with aryl-imidazo-1,10-phenanthroline derivatives: experimental and quantum chemical calculation studies
Source: Royal Society of Chemistry journal article supplement (doi:10.1039/c8nj05697h), 2019-01-01
Supplement: c8nj05697h1.pdf [file c8nj05697h1.pdf]

SUPPORTING INFORMATION

**Intramolecular electron transfer in Cu(II) complexes with aryl-1H-imidazo[4,5-f][1,10]phenanthroline derivatives**

Yury Fedorov, Sergey Tokarev, Elena Lukovskaya, Yulia Sotnikova, Nikolai Shepel, Anna Moiseeva, Anthony D'Aléo, Frédéric Fages, Aleksander Anisimov, François Maurel,  
Olga Fedorova

Content

|                               |                                  |
|-------------------------------|----------------------------------|
| ESI-MS data                   | Figs. S1-S14                     |
| Electronic absorption spectra | Figs. S15 -S22                   |
| Electrochemical data          | Figs S23-S27                     |
| Quantum-chemical calculations | Figs. S28-S33, Tables S1, S2, S3 |

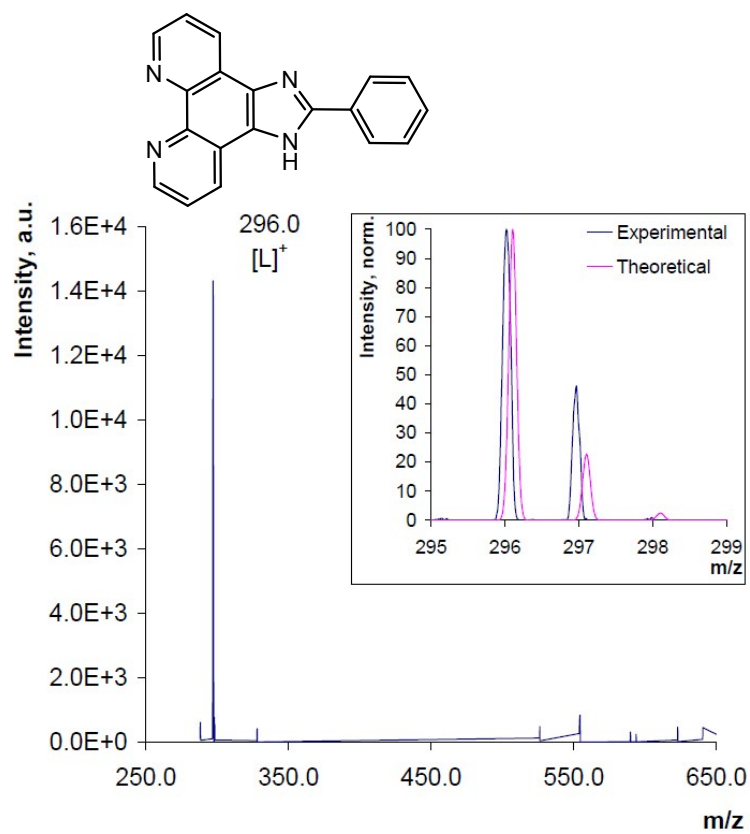

**Fig. S1.** ESI-MS of ligand 1.

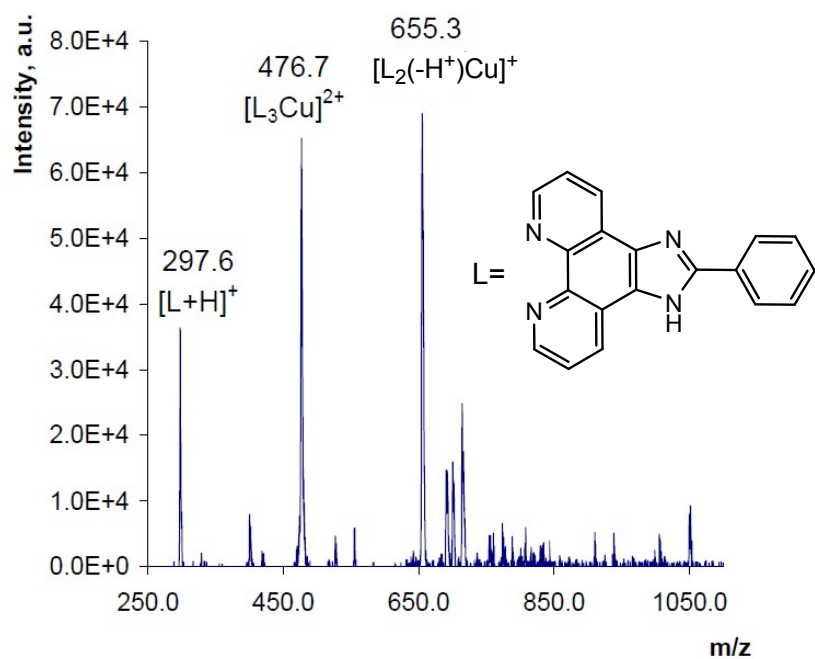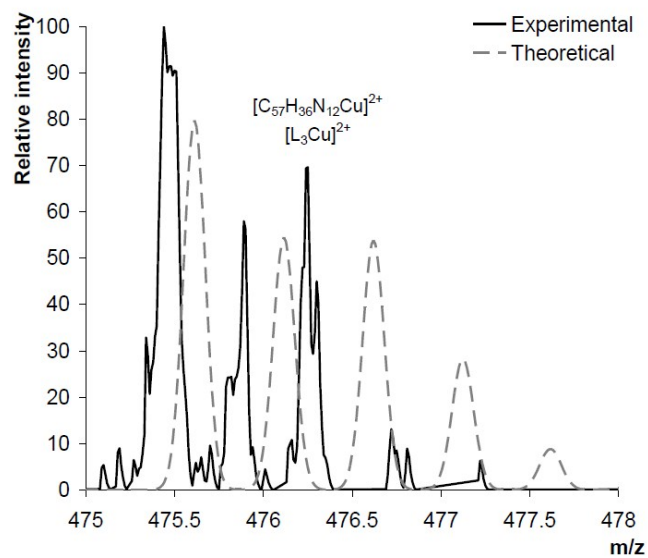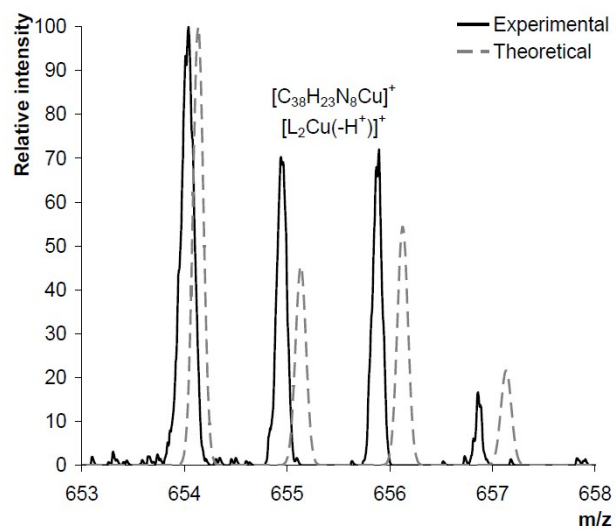

**Fig. S2.** ESI-MS of mixture ligand 1 with  $\text{Cu}^{2+}$ , ratio 3:1.

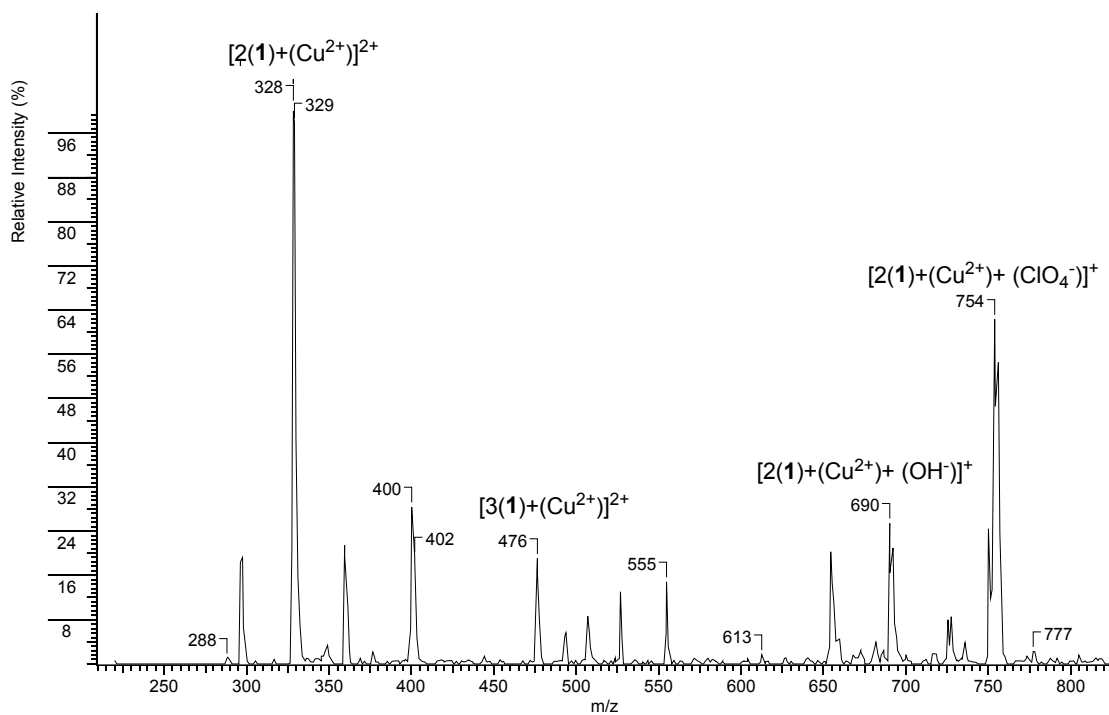

**Fig. S3.** ESI-MS of ligand 1 in the presence of 3-fold excess of  $\text{Cu}(\text{ClO}_4)_2$ .

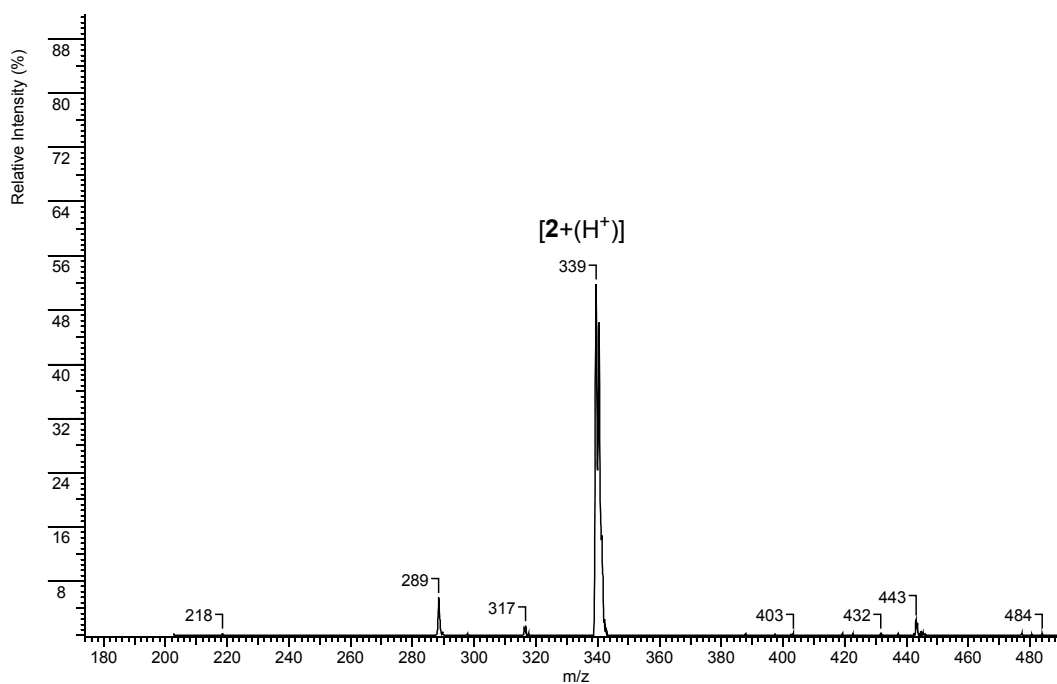

**Fig. S4.** ESI-MS of ligand 2.

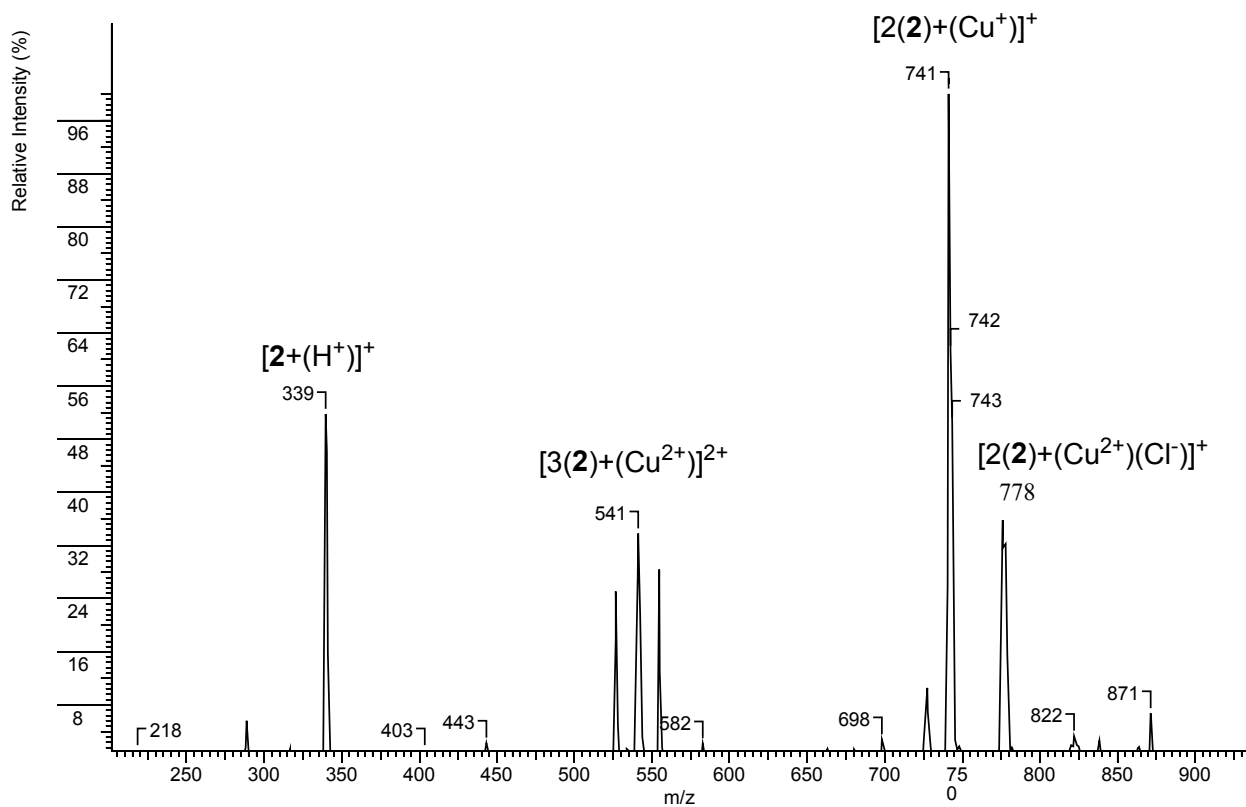

**Fig. S5.** ESI-MS of mixture ligand **2** with  $\text{Cu}^{2+}$ , ratio 3:1.

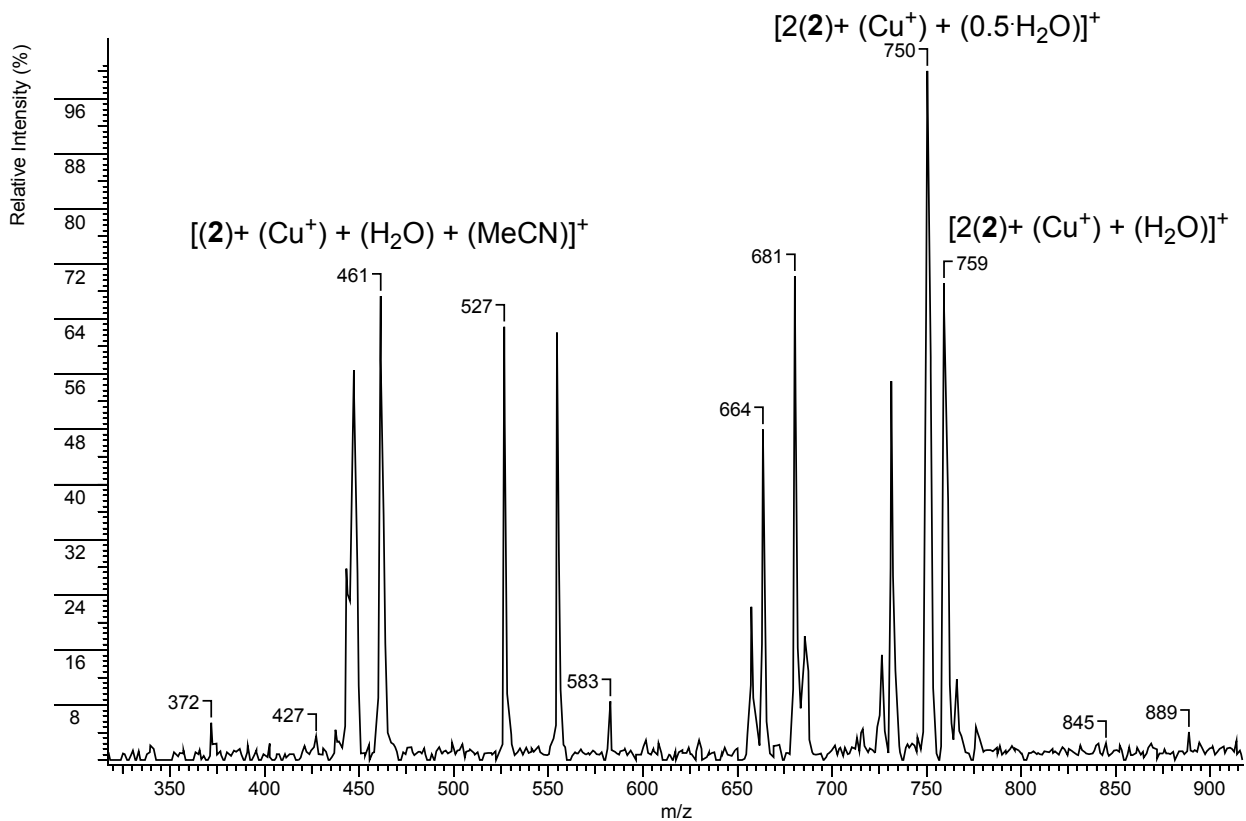

**Fig. S6.** ESI-MS of ligand **2** in the presence of 3-fold excess of  $\text{Cu}(\text{ClO}_4)_2$ .

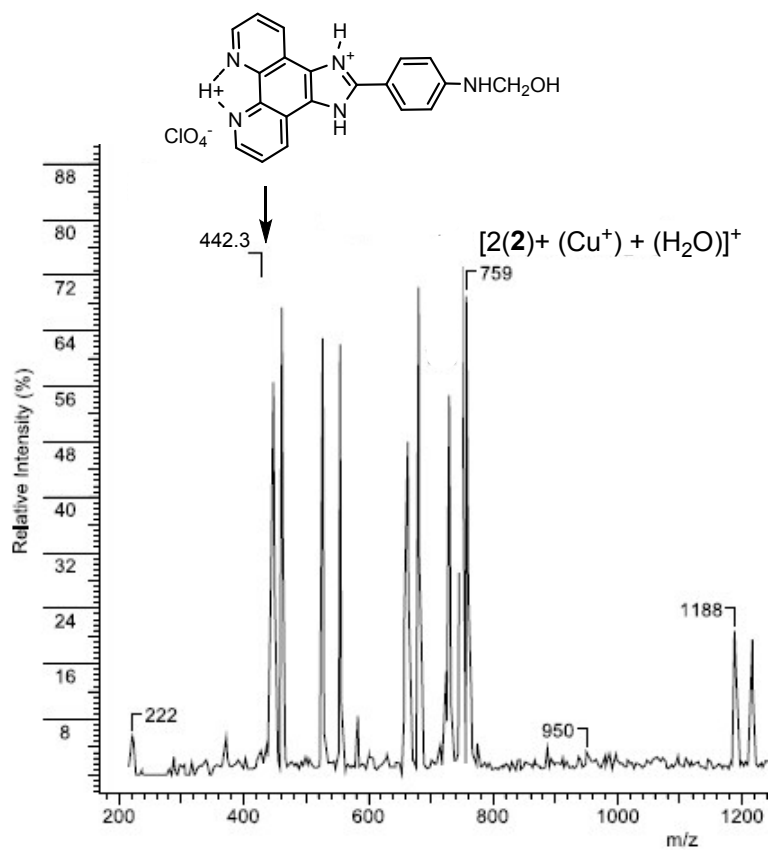

**Fig. S7.** ESI-MS of ligand **3** in the presence of 3-fold excess of  $\text{Cu}(\text{ClO}_4)_2$  after keeping during 48 hours.

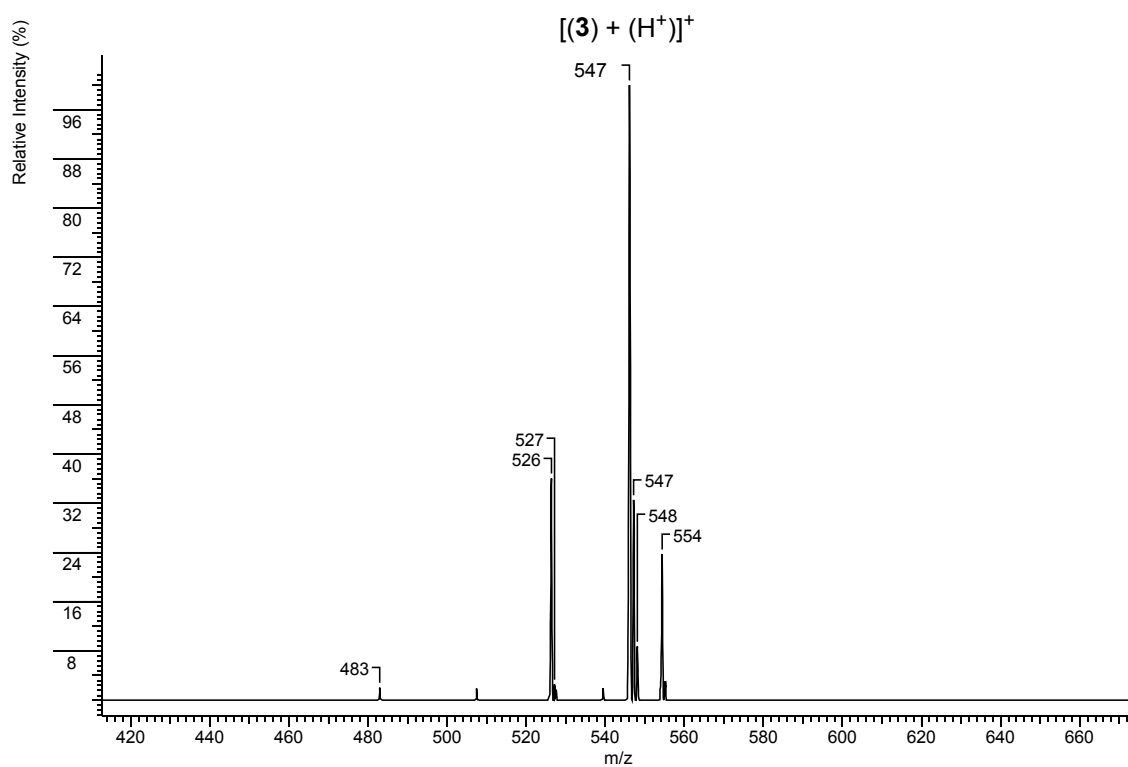

**Fig. S8.** ESI-MS of ligand 3.

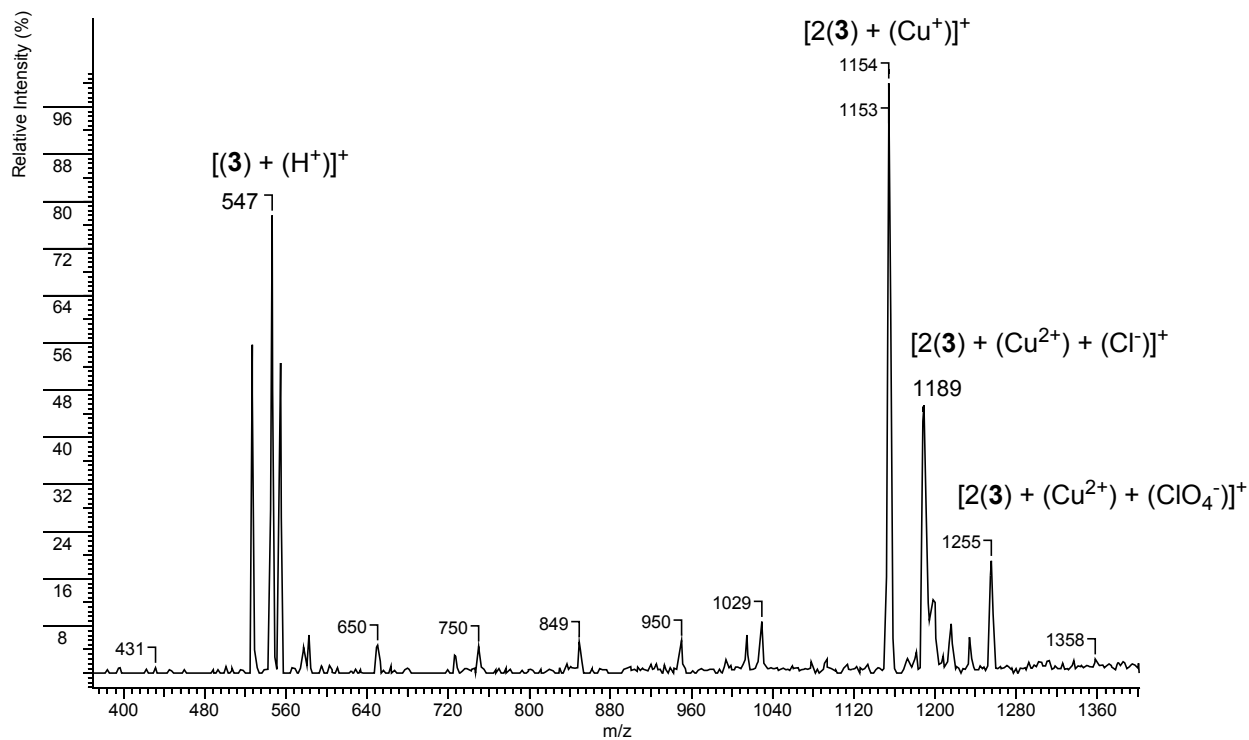

**Fig. S9.** ESI-MS of mixture ligand 3 with  $Cu^{2+}$ , ratio 3:1.

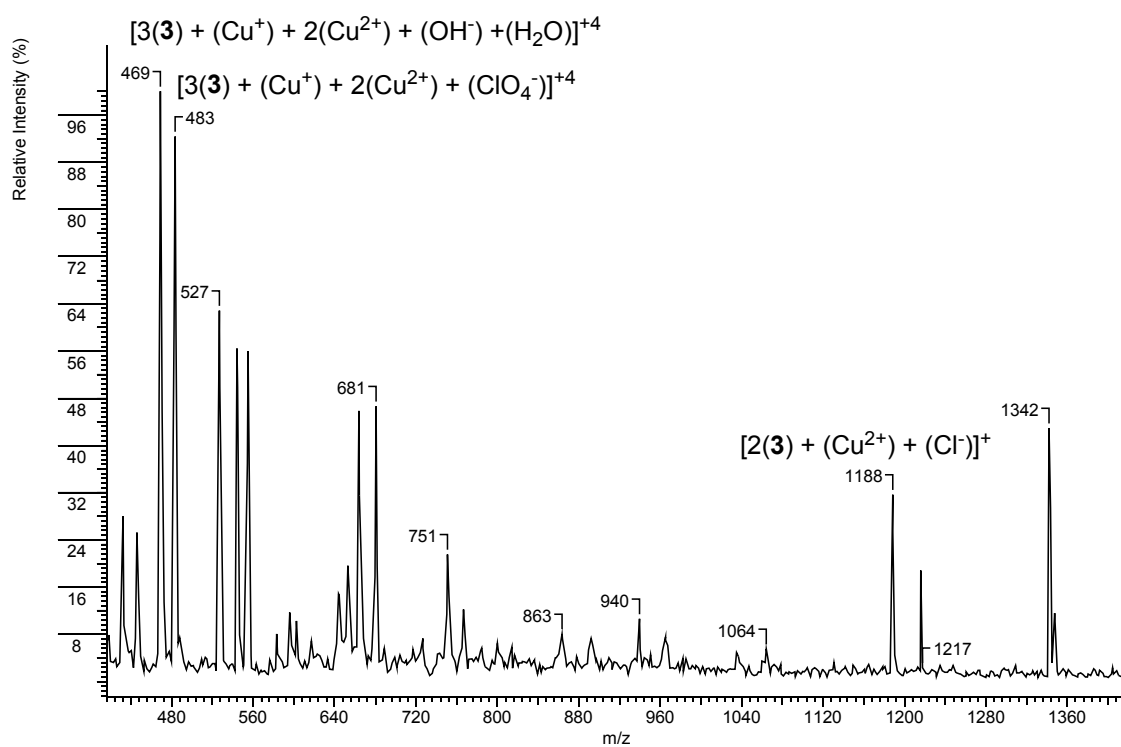

**Fig. S10.** ESI-MS of ligand **3** in the presence of 3-fold excess of  $\text{Cu}(\text{ClO}_4)_2$ .

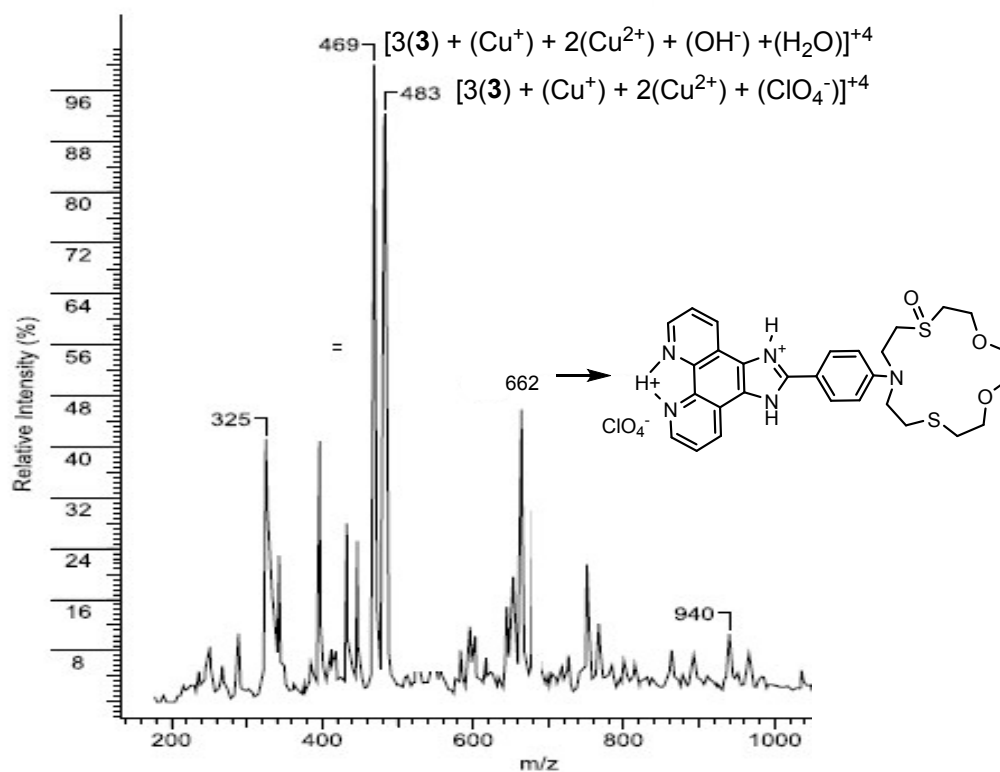

**Fig. S11.** ESI-MS of ligand **3** in the presence of 3-fold excess of  $\text{Cu}(\text{ClO}_4)_2$  after keeping during 48 hours.



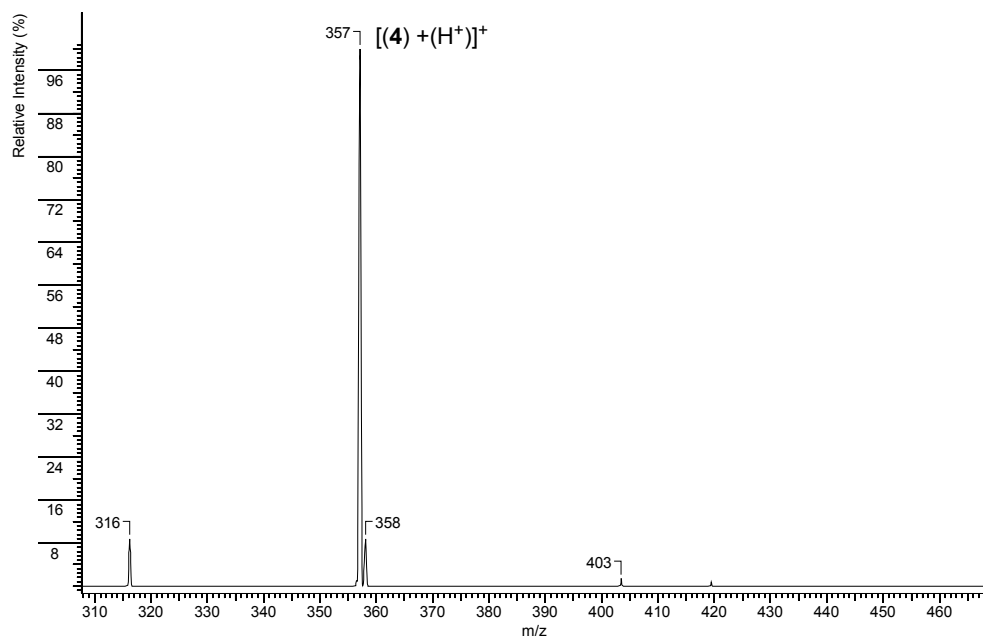

**Fig. S12.** ESI-MS of ligand 4.

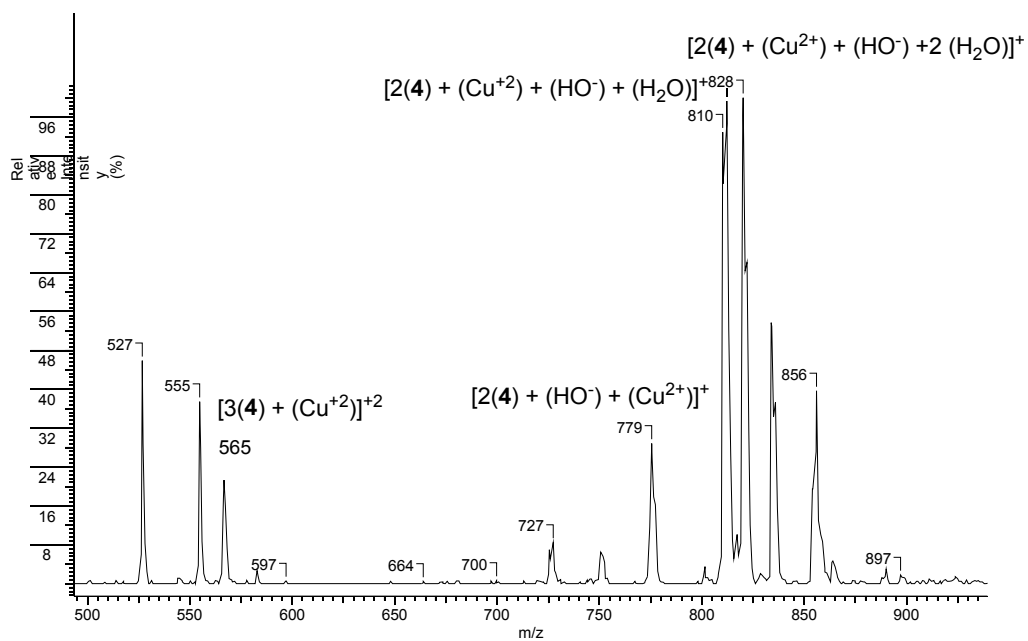

**Fig. S13.** ESI-MS of mixture ligand 4 with  $Cu^{2+}$ , ratio 3:1.

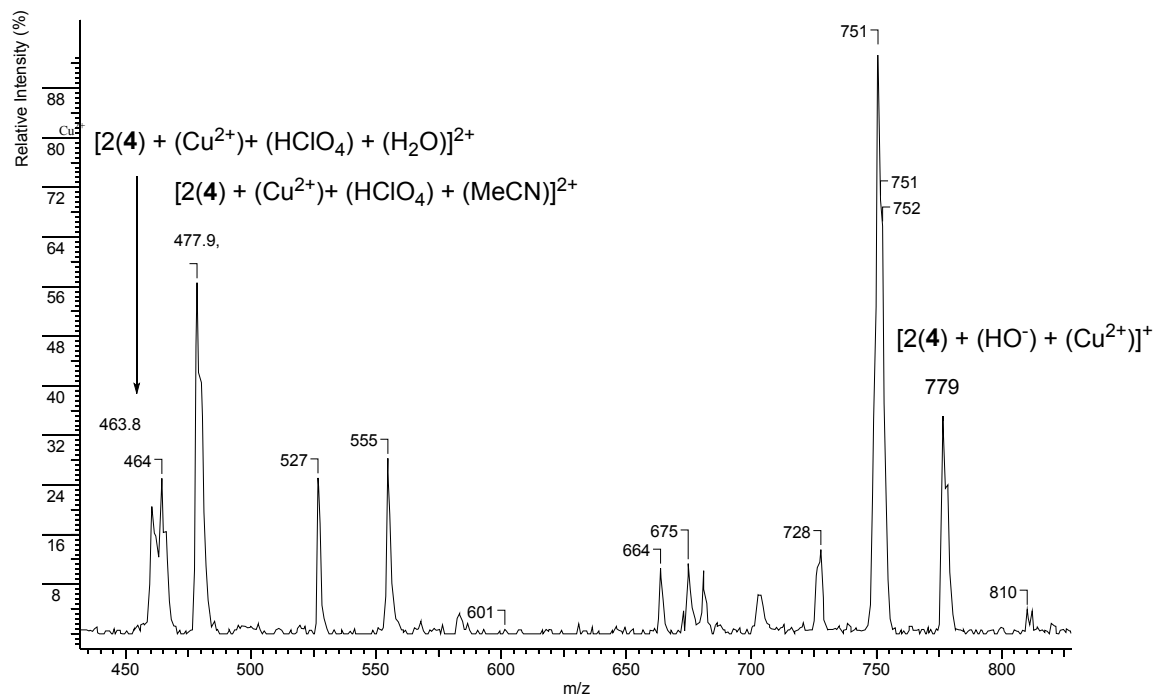

**Fig. S14.** ESI-MS of ligand **4** in the presence of 3-fold excess of  $\text{Cu}(\text{ClO}_4)_2$ .

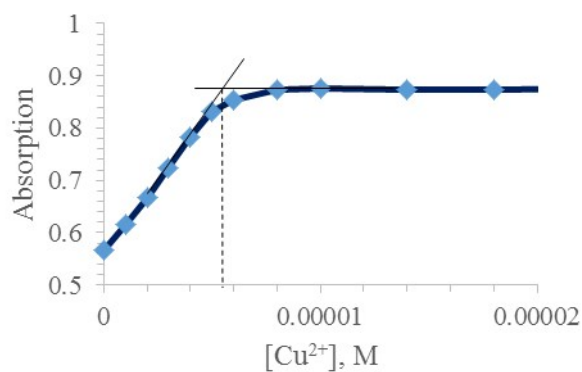

**Fig. S15.** The titration curve of ligand **1** ( $C_1 = 1.67 \cdot 10^{-5}$  M) with copper (II) perchlorate at 280 nm in MeCN.

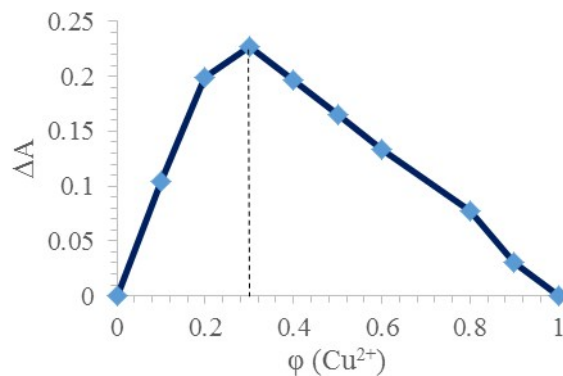

**Fig. S16.** Isomolar series of the **1** and Cu(II) solutions in MeCN (total concentration  $1.67 \cdot 10^{-5}$  M).  $\phi$  - mole fraction of  $\text{Cu}^{2+}$ .  $\Delta A$  - absorption at 308 nm.

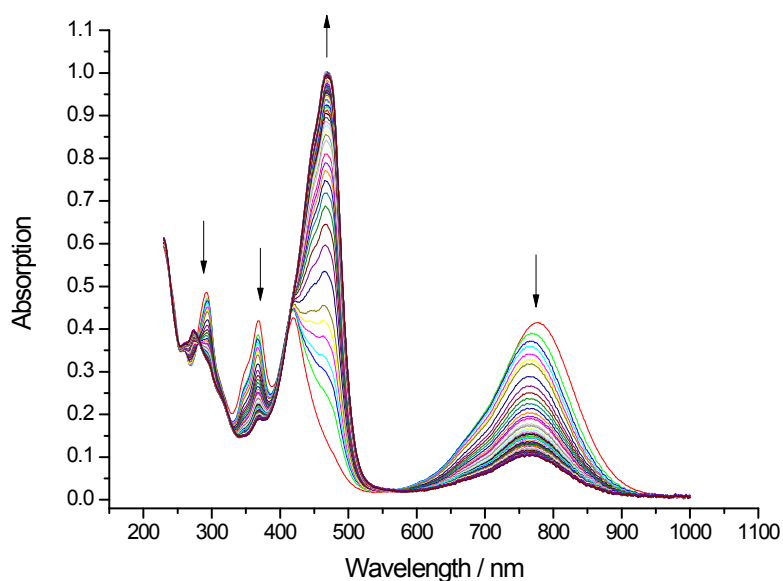

**Fig.S17.** Variation of electronic absorption spectra of  $2 \times 10^{-5}$  mol·L<sup>-1</sup> **2** in the presence of  $2 \times 10^{-4}$  mol·L<sup>-1</sup>  $\text{Cu}(\text{ClO}_4)_2$  on time. Spectra were recorded during 80 min at intervals of 10-60 sec. Solvent – acetonitrile,  $T = 294\text{K}$ .

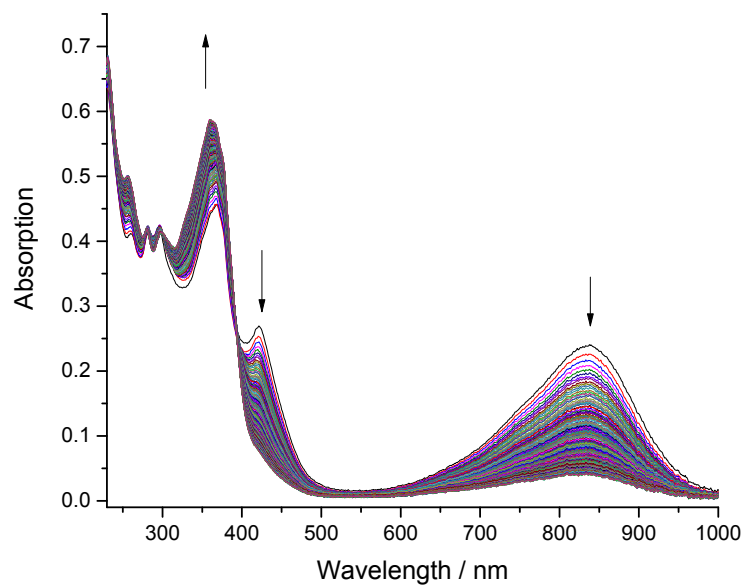

**Fig. S18.** Variation of electronic absorption spectra of  $2 \times 10^{-5} \text{ mol} \cdot \text{L}^{-1}$  **3** in the presence of  $2 \times 10^{-4} \text{ mol} \cdot \text{L}^{-1}$   $\text{Cu}(\text{ClO}_4)_2$  on time. Spectra were recorded during 40 min at intervals of 10 sec. Solvent – acetonitrile,  $T = 294\text{K}$ .

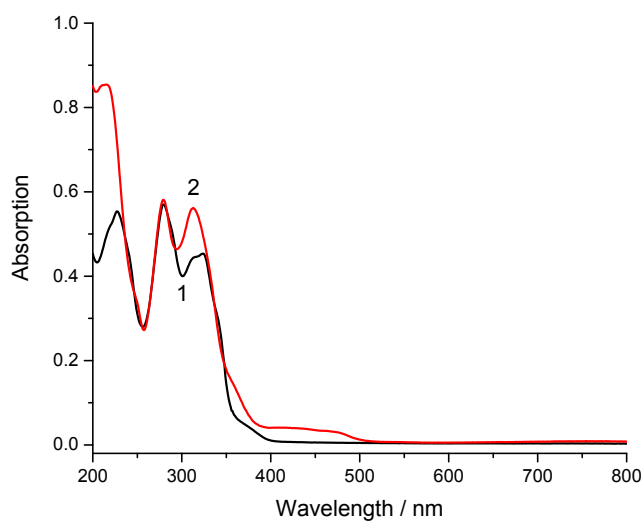

**Fig. S19.** Electronic absorption spectra of  $2 \times 10^{-5} \text{ mol} \cdot \text{L}^{-1}$  of **4** alone (1) and in the presence of  $2 \times 10^{-4} \text{ mol} \cdot \text{L}^{-1}$  (2)  $\text{Cu}(\text{ClO}_4)_2$ . Spectrum (2) was recorded in 30 sec after  $\text{Cu}(\text{ClO}_4)_2$  addition. Solvent – acetonitrile,  $T = 294\text{K}$ .

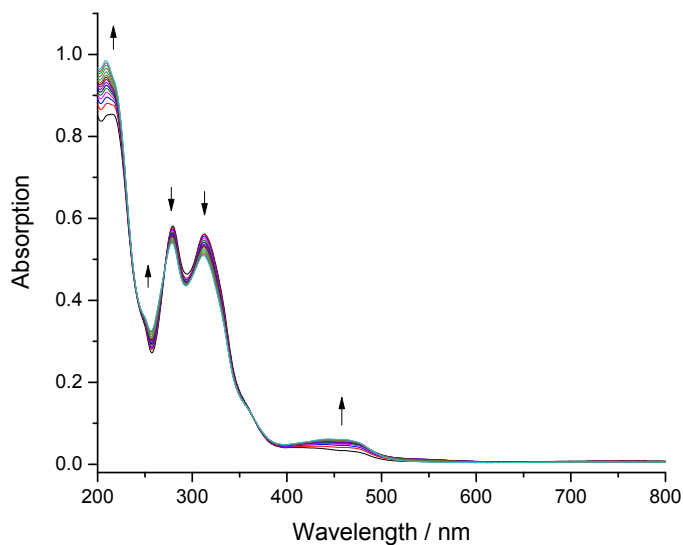

**Fig. S20.** Variation of electronic absorption spectra of  $2 \times 10^{-5} \text{ mol} \cdot \text{L}^{-1}$  **4** in the presence of  $2 \times 10^{-4} \text{ mol} \cdot \text{L}^{-1}$   $\text{Cu}(\text{ClO}_4)_2$  on time. Spectra were recorded during 48 min at intervals of 3 min. Solvent – acetonitrile,  $T = 294\text{K}$ .

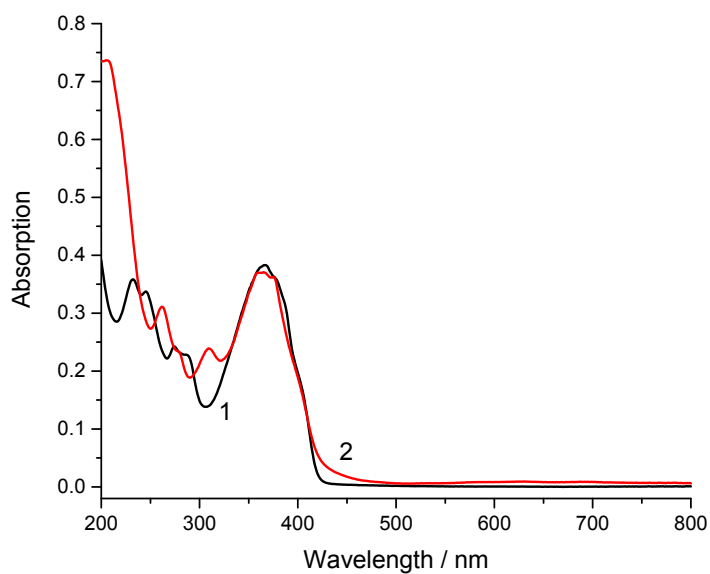

**Fig. S21.** Electronic absorption spectra of  $2 \times 10^{-5} \text{ mol} \cdot \text{L}^{-1}$  of **5** alone (1) and in the presence of  $2 \times 10^{-4} \text{ mol} \cdot \text{L}^{-1}$  (2)  $\text{Cu}(\text{ClO}_4)_2$ . Spectrum (2) was recorded in 30 sec after  $\text{Cu}(\text{ClO}_4)_2$  addition. Solvent – acetonitrile,  $T = 294\text{K}$ .

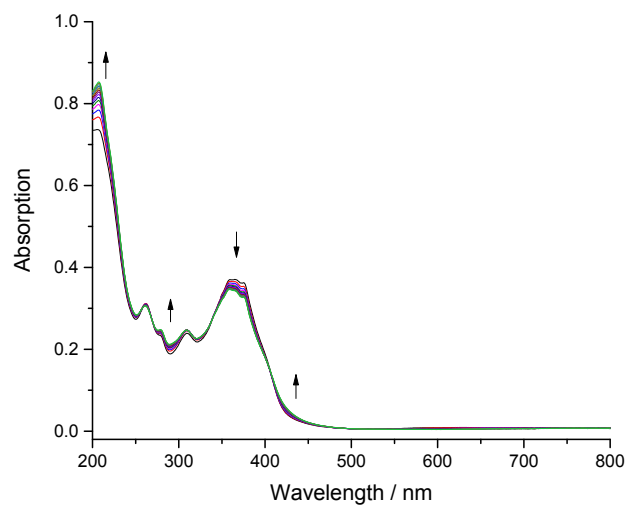

**Fig. S22.** Variation of electronic absorption spectra of  $2 \times 10^{-5} \text{ mol} \cdot \text{L}^{-1}$  **5** in the presence of  $2 \times 10^{-4} \text{ mol} \cdot \text{L}^{-1}$   $\text{Cu}(\text{ClO}_4)_2$  on time. Spectra were recorded during 42 min at intervals of 3 min. Solvent – acetonitrile,  $T = 294\text{K}$ .

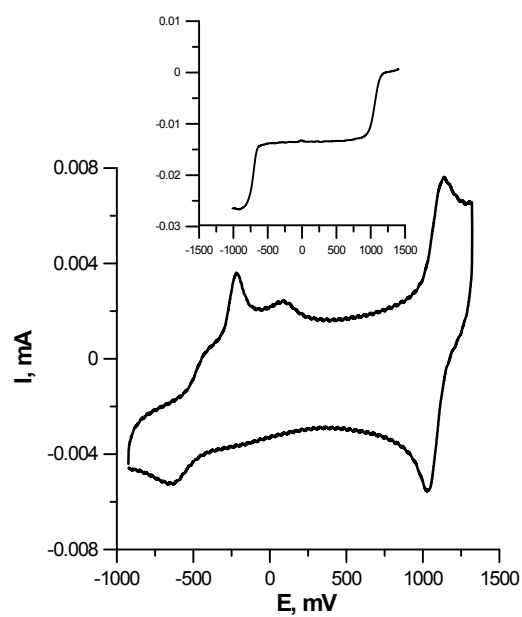

**Fig. S23.** Cyclic voltammogram of  $1.67 \cdot 10^{-4} \text{ M}$  solution of  $\text{Cu}(\text{ClO}_4)_2 \cdot 6\text{H}_2\text{O}$  in  $\text{CH}_3\text{CN}$ . Inset Scan rate dependence of  $\text{Cu}^{2+}/\text{Cu}^+$  redox couple obtained on a rotating disk electrode.

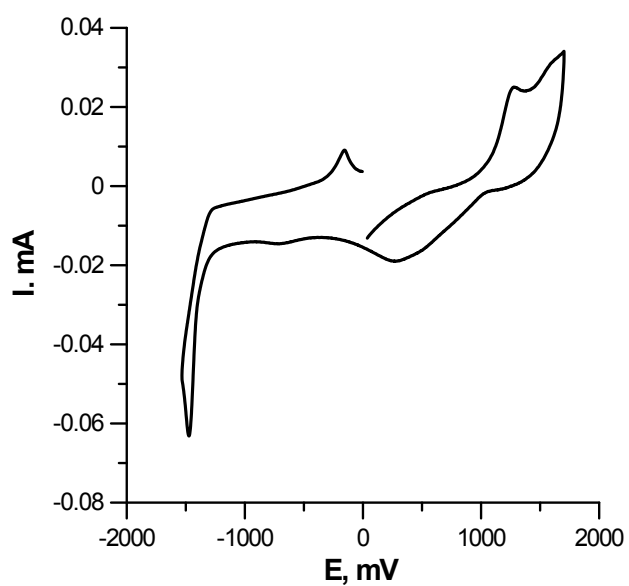

**Fig. S24.** Cyclic voltammogram of  $1.67 \cdot 10^{-4} \text{ M}$  solution of ligand **3** in the presence of 3-fold excess of copper(II) in  $0.1 \text{ M}$  TBAP in  $\text{MeCN}$  at  $100 \text{ mV/s}$ .

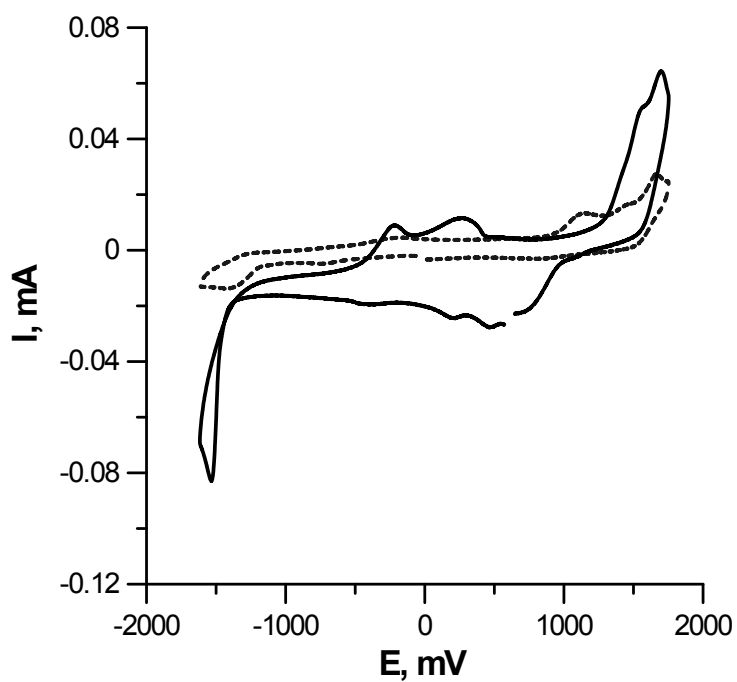

**Fig. S25.** Cyclic voltammogram of  $1.67 \cdot 10^{-4} \text{M}$  solution of ligand **1** (dashed line) and in the presence of 3-fold excess of copper(II) (solid line) recorded after keeping for 4 hours in 0.1 M TBAP in MeCN at 100 mV/s.

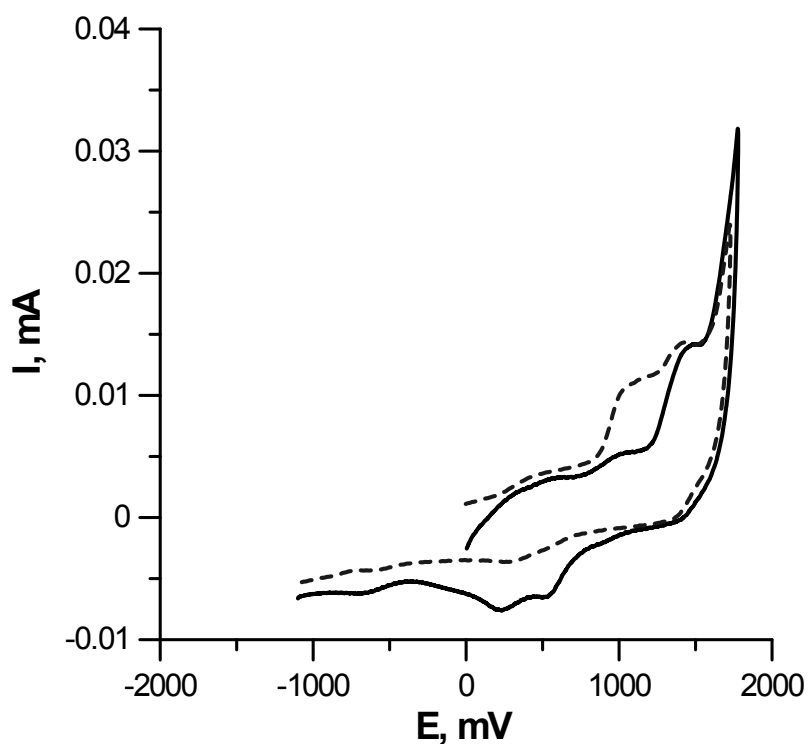

**Fig. S26.** Cyclic voltammogram of  $1.67 \cdot 10^{-4} \text{M}$  solution of ligand **4** (dashed line) and in the presence of 3-fold excess of copper(II) (solid line) recorded after keeping for 4 hours in 0.1 M TBAP in MeCN at 100 mV/s.



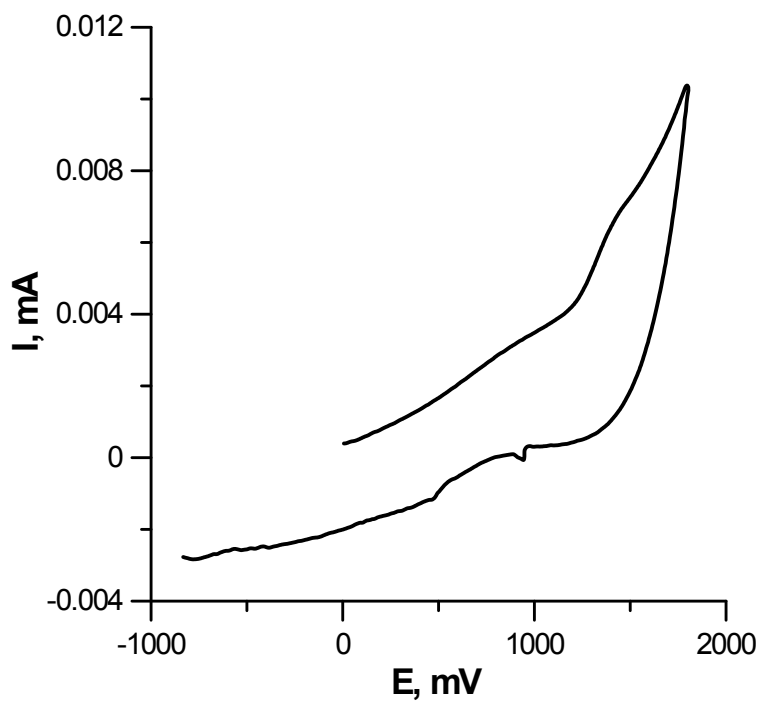

**Fig. S27.** Cyclic voltammogram of  $1.67 \cdot 10^{-4}$  M solution of ligand **5** in 0.1 M TBAP in MeCN at 100 mV/s. The measurement is accompanied by radical polymerization of thiophene derivative on electrode which makes electrochemical analysis difficult.

### Mode of complexation of 2 with Cu(II)

The methodology level used in our calculations have been tested with a model compounds consisting of copper complexed with two phenanthroline ligand ( $\text{Cu}(\text{phen})_2$ ). In order to check the accuracy of our DFT calculation based on PBEPB1 functional, 6-31G(d) and LanL2DZ basis set, we have optimized the structures of  $\text{Cu}(\text{phen})_2^{2+}$ , and  $\text{Cu}(\text{phen})_2^+$  and compared them with the available experimental and theoretical data [Cu-phen]. The optimized geometries are displayed found in **Figure S28** and are found in very good agreement with previous experimental findings [1].

[1] Howell, S. L.; Gordon, K. C. *J. Phys. Chem. A* 2004, 108, 2536-2544; Chen, L. X.; Shaw, G. B.; Novozhilova, I.; Liu, T.; Jennings, G.; Attenkofer, K.; Meyer, G. J.; Coppens, P. *J. Am. Chem. Soc.* 2003, 125, 7022-7034; Philip Coppens, I. V. N. *Int. J. Quantum Chem.* 2005, 101, 611-623; Wang, X. J.; Wang, W.; Koyama, M.; Kubo, M.; Miyamoto, A. *J. Photochem. Photobiol., A* 2006, 179, 149-155.

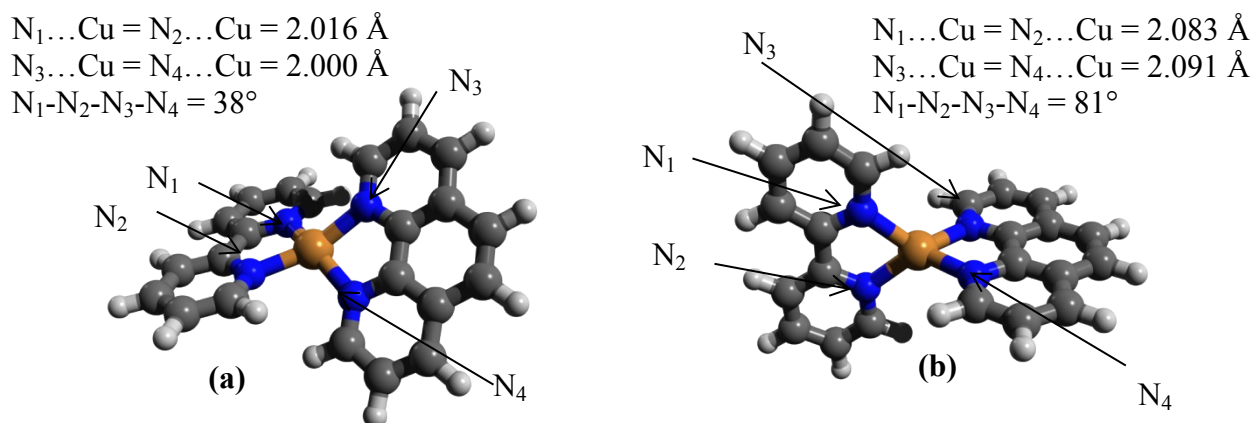

**Fig. S28.** The optimized structure of (a)  $\text{Cu}(\text{phen})_2^{2+}$  and (b)  $\text{Cu}(\text{phen})_2^+$ .

**Table S1.** Selected bond lengths and dihedral angles of the complexes  $2_2 \cdot \text{Cu}^{2+}(\text{Phen}_2)$ ,  $2_2 \cdot \text{Cu}^{2+}(\text{PhenIm}_2)$ ,  $2_2 \cdot \text{Cu}^{2+}(\text{Im}_4)$ ,  $2_2 \cdot \text{Cu}^+(\text{Phen}_2)$ ,  $2_2 \cdot \text{Cu}^+(\text{PhenIm}_2)$  and  $2_2 \cdot \text{Cu}^+(\text{Im}_4)$ .

|             | $2_2 \cdot \text{Cu}^{2+}(\text{Phen}_2)$ | $2_2 \cdot \text{Cu}^{2+}(\text{PhenIm}_2)$ | $2_2 \cdot \text{Cu}^{2+}(\text{Im}_4)$ |
|-------------|-------------------------------------------|---------------------------------------------|-----------------------------------------|
| Cu-N1       | 2.088                                     | 2.024                                       | 2.109                                   |
| Cu-N2       | 2.081                                     | 2.036                                       | 2.126                                   |
| Cu-N3       | 2.085                                     | 2.014                                       | 2.109                                   |
| Cu-N3       | 2.100                                     | 2.026                                       | 2.126                                   |
| NN-NN angle | 80.8°                                     | 26.2°                                       | 1.6°                                    |
|             | $2_2 \cdot \text{Cu}^+(\text{Phen}_2)$    | $2_2 \cdot \text{Cu}^+(\text{PhenIm}_2)$    | $2_2 \cdot \text{Cu}^+(\text{Im}_4)$    |
| Cu-N1       | 2.093                                     | 2.184                                       | 1.922                                   |
| Cu-N2       | 2.084                                     | 2.198                                       | 1.922                                   |
| Cu-N3       | 2.084                                     | 2.124                                       | 4.456                                   |
| Cu-N3       | 2.093                                     | 2.133                                       | 4.4525                                  |
| NN-NN angle | 81.2                                      | 49.5                                        | 3.7                                     |

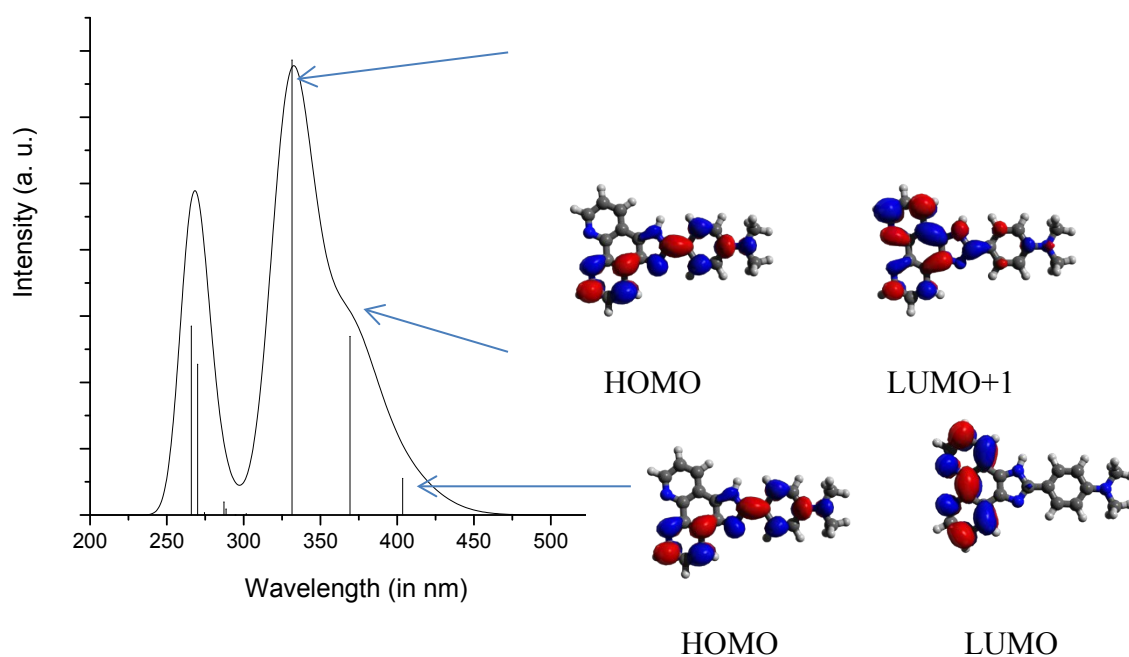

**Figure S29.** Calculated absorption spectrum of compound **2** representing main orbitals implied in the electronic excitations.

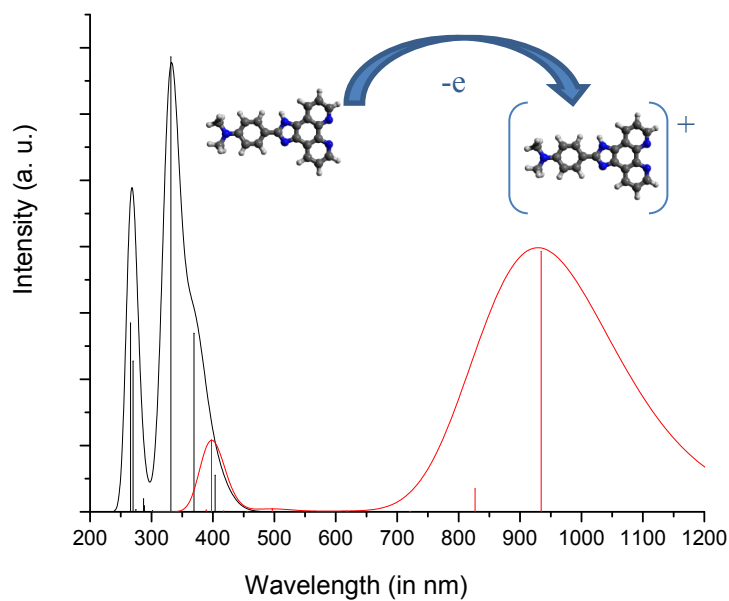

**Figure S30.** Comparison of the calculated absorption spectra of **2** in neutral (black curve) and cationic states (red curve).

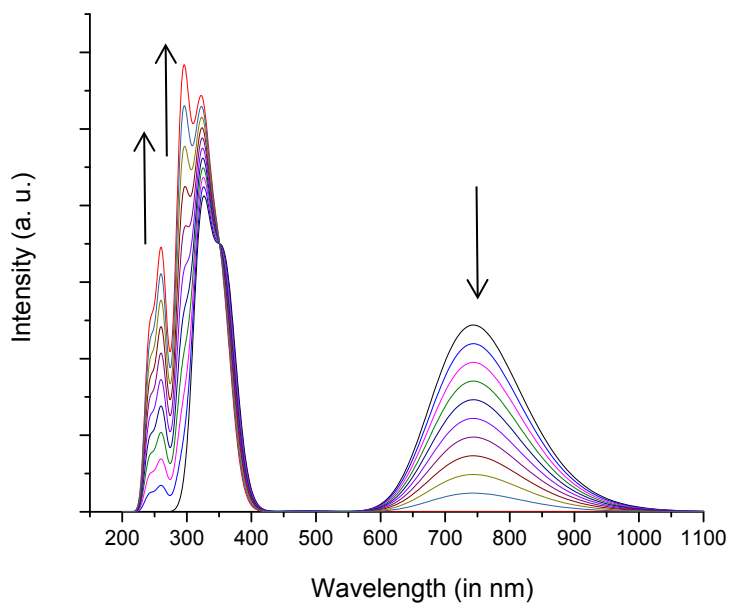

**Figure S31.** Expected evolution of the absorption spectra obtained from the reduction of the  $2_2\text{-Cu}^{2+}$  complex. The spectra were obtained by summing the spectra of using the equation  $2_2\text{-Cu}^{2+}$  and  $2_2\text{-Cu}^{2+}$  using the following equation:  $1-x (2_2\text{-Cu}^{2+}) + x 2_2\text{-Cu}^{+}$  ( $0 \leq x \leq 1$ ). The black arrow displays the expected evolution of the absorption spectrum upon reduction of the  $2_2\text{-Cu}^{2+}$  complex.

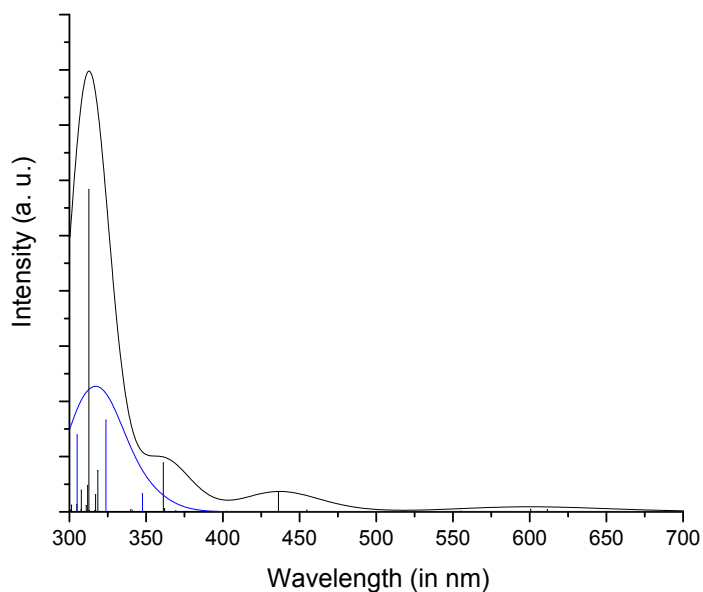

**Figure S32.** B3LYP calculated absorption spectra of ligand **1** (blue curve) and the complexes  $\text{Cu}^{2+}(\text{1-Phen})_2$  (black curve).

**Figure S33** Main calculated molecular orbitals implied in the lowest allowed electronic transitions for  $\text{Cu}^{2+}(\mathbf{2})_2$  and  $\text{Cu}^+(\mathbf{2})_2$  complexes (B3LYP level of calculations).

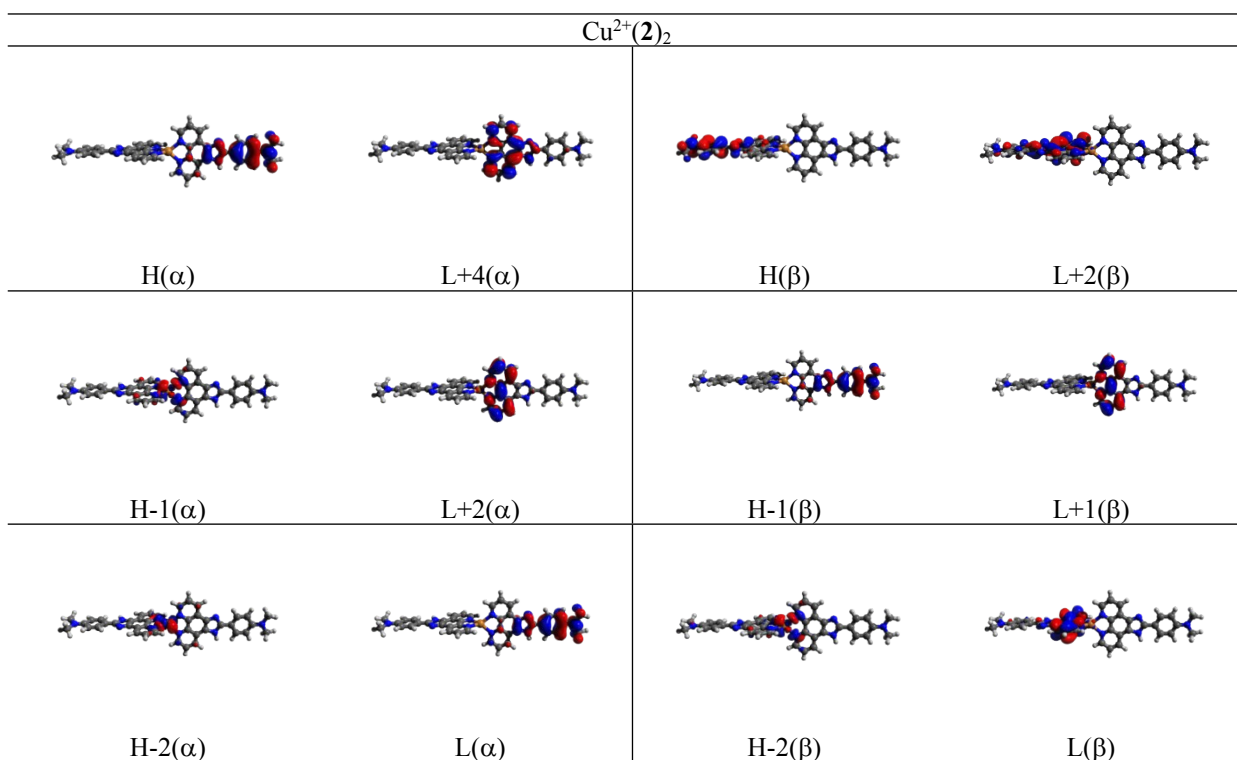

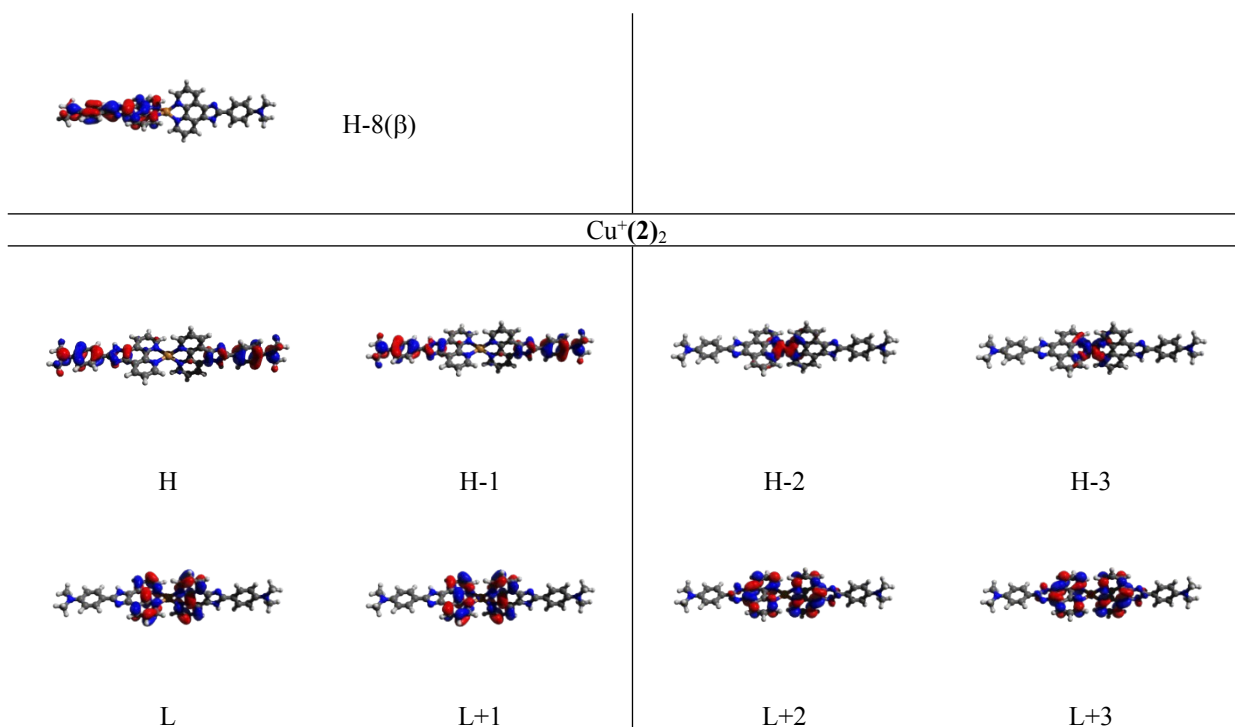

**Table S2.** Selected computed UV-vis energies transitions in acetonitrile for  $\text{Cu}^{2+}(\text{2-Phen})_2$  complex.

| States          | $\lambda_{\text{calc}}$<br>(nm) | Oscillator<br>strength ( <i>f</i> ) | Assignment*                                         | Character**    |
|-----------------|---------------------------------|-------------------------------------|-----------------------------------------------------|----------------|
| <b>B3LYP</b>    |                                 |                                     |                                                     |                |
| S <sub>8</sub>  | 751                             | 0.599                               | H-7(β)→L(β)                                         | MLCT           |
| S <sub>21</sub> | 479                             | 0.221                               | H-1(α)→L(α), H(α)→L+2(α), H-2(β)→L+2(β)             | MLCT +<br>π→π* |
| S <sub>22</sub> | 479                             | 0.134                               | H-2(α)→L+2(α),<br>HOMO(α)→L+4(α),<br>HOMO(β)→L+2(β) | MLCT           |
| S <sub>26</sub> | 465                             | 0.028                               | H-1(α)→LUMO(α),<br>HOMO(α)→L+2(α), H-1(β)→L+1(β)    | π→π*           |
| <b>M062X</b>    |                                 |                                     |                                                     |                |
| S <sub>2</sub>  | 743                             | 0.673                               | H-3(β)→LUMO(β), H-2(β)<br>→LUMO(β)                  | MLCT           |
| S <sub>13</sub> | 361                             | 0.575                               | H-1(α)→LUMO(α), H-1(α)→L+1(α)                       | π→π*           |
| S <sub>14</sub> | 351                             | 0.245                               | HOMO(α)→L+2(α) (37%),<br>HOMO(β)→L+2(β) (37%)       | π→π*           |
| S <sub>23</sub> | 327                             | 0.403                               | H-7(α)→LUMO(α) (12%), H-                            | π→π*           |

|                 |     |       |                                                                                          |      |
|-----------------|-----|-------|------------------------------------------------------------------------------------------|------|
| S <sub>24</sub> | 322 | 0.567 | 1(α)→L+1(α) (13%), H-1(α)->L+3(α) (16%)<br>HOMO(α)→L+4(α) (37%),<br>HOMO(β)→L+4(β) (37%) | π→π* |
| <b>MPW1PW91</b> |     |       |                                                                                          |      |
| S <sub>4</sub>  | 782 | 0.616 | H-5(β)→LUMO(β) (92%)                                                                     | MLCT |
| S <sub>19</sub> | 447 | 0.203 | HOMO(α)→L+2(α) (43%),<br>HOMO(β)→L+2(β) (44%)                                            |      |
| S <sub>26</sub> | 423 | 0.241 | H-1(α)→LUMO(α) (30%), H-1(β)→L+1(β) (39%)                                                |      |

\* H=HOMO, L=LUMO \*\* MLCT = ligand to metal charge transfer

**Table S3.** Selected computed UV-vis energies transitions in acetonitrile for Cu<sup>+</sup>(2-Phen)<sub>2</sub> complex.

| States          | λ <sub>calc</sub> (nm) | Oscillator strength (f) | Assignment         | Character* |
|-----------------|------------------------|-------------------------|--------------------|------------|
| <b>B3LYP</b>    |                        |                         |                    |            |
| S <sub>2</sub>  | 475                    | 0.252                   | H-1→L+1 HOMO->LUMO |            |
| S <sub>7</sub>  | 436                    | 0.325                   | 3→LUMO H-2→L+1     |            |
| S <sub>8</sub>  | 406                    | 0.309                   | H-1→L+2 HOMO→L+3   |            |
| <b>M062X</b>    |                        |                         |                    |            |
| S <sub>1</sub>  | 352                    | 0.772                   | H-1→L+1 HOMO→LUMO  |            |
| S <sub>5</sub>  | 322                    | 1.262                   | H-1→L+2 HOMO→L+3   |            |
| S <sub>7</sub>  | 294                    | 1.471                   | H-1→L+4 HOMO→L+5   |            |
| <b>MPW1PW91</b> |                        |                         |                    |            |
| S <sub>2</sub>  | 446                    | 0.338                   | H-1→L+1 HOMO→LUMO  |            |
| S <sub>8</sub>  | 385                    | 0.4202                  | H-1→L+2 HOMO→L+3   |            |

### Cartesian coordinates of the optimized studied complexes

#### Cu<sup>2+</sup>(Phen)<sub>2</sub>

|    |    |   |           |           |           |
|----|----|---|-----------|-----------|-----------|
| 1  | 29 | 0 | 0.035996  | 0.042548  | -0.060468 |
| 2  | 7  | 0 | 0.049241  | 0.568051  | 1.886112  |
| 3  | 6  | 0 | 1.238845  | 0.279426  | 2.466037  |
| 4  | 6  | 0 | -0.933958 | 1.053856  | 2.632802  |
| 5  | 6  | 0 | 2.249163  | -0.294272 | 1.634997  |
| 6  | 6  | 0 | 1.499366  | 0.517957  | 3.828120  |
| 7  | 1  | 0 | -1.880445 | 1.246702  | 2.138456  |
| 8  | 6  | 0 | -0.771153 | 1.310081  | 4.001637  |
| 9  | 6  | 0 | 3.520833  | -0.577642 | 2.166594  |
| 10 | 7  | 0 | 1.924126  | -0.538567 | 0.342928  |
| 11 | 6  | 0 | 0.445741  | 1.054248  | 4.597189  |
| 12 | 6  | 0 | 2.795771  | 0.207044  | 4.350951  |
| 13 | 1  | 0 | -1.603465 | 1.710718  | 4.568529  |
| 14 | 6  | 0 | 4.480484  | -1.111176 | 1.281375  |
| 15 | 6  | 0 | 3.768251  | -0.311911 | 3.551822  |
| 16 | 6  | 0 | 2.848349  | -1.022638 | -0.476658 |
| 17 | 1  | 0 | 0.599626  | 1.256276  | 5.653133  |
| 18 | 6  | 0 | 4.146631  | -1.321619 | -0.039693 |
| 19 | 1  | 0 | 5.475987  | -1.346840 | 1.645996  |
| 20 | 1  | 0 | 2.558387  | -1.179294 | -1.510479 |
| 21 | 1  | 0 | 4.865515  | -1.718930 | -0.746777 |
| 22 | 7  | 0 | -1.344681 | 1.249591  | -0.858110 |

|    |   |   |           |           |           |
|----|---|---|-----------|-----------|-----------|
| 23 | 6 | 0 | -1.631420 | 2.485141  | -0.438685 |
| 24 | 6 | 0 | -1.898794 | 0.770863  | -1.991714 |
| 25 | 6 | 0 | -2.519430 | 3.305728  | -1.121143 |
| 26 | 1 | 0 | -1.128802 | 2.822617  | 0.461316  |
| 27 | 6 | 0 | -2.796289 | 1.539243  | -2.725125 |
| 28 | 6 | 0 | -1.464736 | -0.585481 | -2.374980 |
| 29 | 6 | 0 | -3.113694 | 2.818131  | -2.278942 |
| 30 | 1 | 0 | -2.729608 | 4.301301  | -0.748153 |
| 31 | 6 | 0 | -2.012023 | -1.311684 | -3.427076 |
| 32 | 7 | 0 | -0.483261 | -1.109034 | -1.610862 |
| 33 | 1 | 0 | -3.812714 | 3.429266  | -2.840375 |
| 34 | 6 | 0 | -1.539029 | -2.595110 | -3.680989 |
| 35 | 6 | 0 | -0.041833 | -2.349097 | -1.839130 |
| 36 | 6 | 0 | -0.542489 | -3.129144 | -2.872834 |
| 37 | 1 | 0 | -1.956008 | -3.173666 | -4.498744 |
| 38 | 1 | 0 | 0.725276  | -2.723639 | -1.169968 |
| 39 | 1 | 0 | -0.156910 | -4.129834 | -3.029070 |
| 40 | 1 | 0 | -2.804428 | -0.893885 | -4.036002 |
| 41 | 1 | 0 | -3.235733 | 1.157404  | -3.638547 |
| 42 | 1 | 0 | 4.750886  | -0.537419 | 3.954235  |
| 43 | 1 | 0 | 2.989057  | 0.398138  | 5.401895  |

**Cu<sup>+</sup>(Phen)<sub>2</sub>**

|    |    |   |           |           |           |
|----|----|---|-----------|-----------|-----------|
| 1  | 29 | 0 | 0.040666  | 0.041590  | -0.055050 |
| 2  | 7  | 0 | -0.010554 | 0.013663  | 2.034912  |
| 3  | 6  | 0 | 1.233276  | -0.004965 | 2.568907  |
| 4  | 6  | 0 | -1.052306 | 0.014487  | 2.855032  |
| 5  | 6  | 0 | 2.354523  | -0.004969 | 1.663743  |
| 6  | 6  | 0 | 1.464469  | -0.023639 | 3.962404  |
| 7  | 1  | 0 | -2.033555 | 0.028962  | 2.389562  |
| 8  | 6  | 0 | -0.924846 | -0.002017 | 4.252422  |
| 9  | 6  | 0 | 3.667879  | -0.027296 | 2.183580  |
| 10 | 7  | 0 | 2.094902  | 0.016393  | 0.335308  |
| 11 | 6  | 0 | 0.336327  | -0.021246 | 4.807260  |
| 12 | 6  | 0 | 2.808570  | -0.044926 | 4.455803  |
| 13 | 1  | 0 | -1.814601 | 0.000302  | 4.872648  |
| 14 | 6  | 0 | 4.731632  | -0.027808 | 1.258967  |
| 15 | 6  | 0 | 3.866735  | -0.047109 | 3.601532  |
| 16 | 6  | 0 | 3.116277  | 0.016240  | -0.510037 |
| 17 | 1  | 0 | 0.472784  | -0.034766 | 5.885101  |
| 18 | 6  | 0 | 4.455301  | -0.006111 | -0.090827 |
| 19 | 1  | 0 | 5.756403  | -0.045070 | 1.619641  |
| 20 | 1  | 0 | 2.868266  | 0.034463  | -1.567337 |
| 21 | 1  | 0 | 5.249225  | -0.005747 | -0.829768 |
| 22 | 7  | 0 | -0.952383 | 1.400809  | -1.281877 |
| 23 | 6  | 0 | -0.886606 | 2.733085  | -1.207438 |
| 24 | 6  | 0 | -1.714925 | 0.831299  | -2.234609 |
| 25 | 6  | 0 | -1.573256 | 3.573015  | -2.075467 |
| 26 | 1  | 0 | -0.257361 | 3.136391  | -0.419571 |
| 27 | 6  | 0 | -2.434430 | 1.607985  | -3.144708 |
| 28 | 6  | 0 | -1.735356 | -0.653583 | -2.250174 |
| 29 | 6  | 0 | -2.361838 | 2.993173  | -3.063169 |
| 30 | 1  | 0 | -1.487515 | 4.649473  | -1.974787 |
| 31 | 6  | 0 | -2.489336 | -1.390866 | -3.165123 |
| 32 | 7  | 0 | -0.977233 | -1.263755 | -1.319334 |
| 33 | 1  | 0 | -2.915760 | 3.609213  | -3.764675 |
| 34 | 6  | 0 | -2.454279 | -2.778933 | -3.113152 |
| 35 | 6  | 0 | -0.946569 | -2.598611 | -1.274132 |
| 36 | 6  | 0 | -1.667734 | -3.400893 | -2.149754 |
| 37 | 1  | 0 | -3.035963 | -3.364602 | -3.818192 |



|    |   |   |           |           |           |
|----|---|---|-----------|-----------|-----------|
| 38 | 1 | 0 | -0.317932 | -3.035560 | -0.503919 |
| 39 | 1 | 0 | -1.610224 | -4.481184 | -2.072844 |
| 40 | 1 | 0 | -3.099965 | -0.897494 | -3.911703 |
| 41 | 1 | 0 | -3.045541 | 1.147269  | -3.911485 |
| 42 | 1 | 0 | 4.884306  | -0.063761 | 3.981275  |
| 43 | 1 | 0 | 2.965194  | -0.059513 | 5.530599  |

## Ligand 2

|    |   |   |           |           |           |
|----|---|---|-----------|-----------|-----------|
| 1  | 6 | 0 | -0.025048 | 0.141939  | 0.037442  |
| 2  | 6 | 0 | -0.025884 | 0.180606  | 1.440579  |
| 3  | 6 | 0 | 2.264006  | 0.079771  | 1.563181  |
| 4  | 6 | 0 | 2.371641  | 0.036462  | 0.142861  |
| 5  | 6 | 0 | 1.186032  | 0.069358  | -0.614383 |
| 6  | 6 | 0 | 3.469007  | 0.047052  | 2.397959  |
| 7  | 6 | 0 | 4.395396  | 0.060907  | 4.495949  |
| 8  | 1 | 0 | 4.228099  | 0.097016  | 5.571877  |
| 9  | 6 | 0 | 5.706290  | -0.011355 | 3.997046  |
| 10 | 6 | 0 | 5.882757  | -0.055880 | 2.631738  |
| 11 | 6 | 0 | 4.753073  | -0.027211 | 1.796779  |
| 12 | 6 | 0 | 4.834604  | -0.068802 | 0.369216  |
| 13 | 6 | 0 | 3.683743  | -0.037453 | -0.404364 |
| 14 | 1 | 0 | -0.959964 | 0.168958  | -0.513023 |
| 15 | 1 | 0 | -0.970398 | 0.238351  | 1.979960  |
| 16 | 1 | 0 | 1.224860  | 0.037635  | -1.699792 |
| 17 | 1 | 0 | 6.550891  | -0.031089 | 4.678651  |
| 18 | 1 | 0 | 6.871081  | -0.112384 | 2.185063  |
| 19 | 7 | 0 | 3.313746  | 0.089477  | 3.736328  |
| 20 | 7 | 0 | 1.069357  | 0.151108  | 2.180743  |
| 21 | 6 | 0 | 5.502454  | -0.153344 | -1.662326 |
| 22 | 7 | 0 | 5.951458  | -0.140545 | -0.414792 |
| 23 | 7 | 0 | 4.133011  | -0.092829 | -1.698645 |
| 24 | 1 | 0 | 3.562567  | -0.076807 | -2.530374 |
| 25 | 6 | 0 | 6.343148  | -0.221023 | -2.847581 |
| 26 | 6 | 0 | 7.738463  | -0.229319 | -2.700332 |
| 27 | 6 | 0 | 5.831451  | -0.282163 | -4.151252 |
| 28 | 6 | 0 | 8.583866  | -0.290586 | -3.791272 |
| 29 | 1 | 0 | 8.156151  | -0.186070 | -1.698940 |
| 30 | 6 | 0 | 6.664179  | -0.343930 | -5.255145 |
| 31 | 1 | 0 | 4.758864  | -0.288722 | -4.329656 |
| 32 | 6 | 0 | 8.071238  | -0.345677 | -5.109859 |
| 33 | 1 | 0 | 9.654430  | -0.294906 | -3.621080 |
| 34 | 1 | 0 | 6.216328  | -0.393998 | -6.240836 |
| 35 | 7 | 0 | 8.900398  | -0.397708 | -6.195022 |
| 36 | 6 | 0 | 8.344901  | -0.490316 | -7.526795 |
| 37 | 1 | 0 | 9.157599  | -0.503877 | -8.253543 |
| 38 | 1 | 0 | 7.751877  | -1.405520 | -7.662503 |
| 39 | 1 | 0 | 7.701892  | 0.369433  | -7.756347 |
| 40 | 6 | 0 | 10.333734 | -0.443318 | -6.008578 |
| 41 | 1 | 0 | 10.820309 | -0.478034 | -6.983647 |
| 42 | 1 | 0 | 10.701426 | 0.445996  | -5.479957 |
| 43 | 1 | 0 | 10.645979 | -1.330727 | -5.440788 |

## Ligand 1

|   |   |   |          |           |           |
|---|---|---|----------|-----------|-----------|
| 1 | 7 | 0 | 3.918379 | -1.287974 | -0.007701 |
| 2 | 6 | 0 | 3.975994 | -2.609103 | -0.013287 |
| 3 | 6 | 0 | 2.709493 | -0.695375 | -0.003885 |
| 4 | 6 | 0 | 2.847645 | -3.443385 | -0.015489 |
| 5 | 1 | 0 | 4.973018 | -3.047427 | -0.016130 |
| 6 | 6 | 0 | 1.504593 | -1.454182 | -0.006294 |
| 7 | 6 | 0 | 2.663435 | 0.771507  | 0.003200  |

|    |   |   |           |           |           |
|----|---|---|-----------|-----------|-----------|
| 8  | 6 | 0 | 1.601076  | -2.857222 | -0.012075 |
| 9  | 1 | 0 | 2.962534  | -4.522455 | -0.019687 |
| 10 | 6 | 0 | 0.281459  | -0.722804 | -0.002131 |
| 11 | 6 | 0 | 1.416132  | 1.447937  | 0.007586  |
| 12 | 7 | 0 | 3.833064  | 1.440405  | 0.005317  |
| 13 | 1 | 0 | 0.705017  | -3.471644 | -0.013462 |
| 14 | 6 | 0 | 0.219306  | 0.663356  | 0.004687  |
| 15 | 7 | 0 | -1.025454 | -1.130745 | -0.002755 |
| 16 | 6 | 0 | 1.414937  | 2.852485  | 0.013784  |
| 17 | 6 | 0 | 3.800984  | 2.762255  | 0.011184  |
| 18 | 7 | 0 | -1.076949 | 1.093754  | 0.007736  |
| 19 | 6 | 0 | -1.809573 | -0.008109 | 0.002448  |
| 20 | 1 | 0 | -1.353109 | -2.084882 | -0.019250 |
| 21 | 6 | 0 | 2.619445  | 3.520990  | 0.015469  |
| 22 | 1 | 0 | 0.467278  | 3.382904  | 0.016937  |
| 23 | 1 | 0 | 4.766720  | 3.266276  | 0.012560  |
| 24 | 6 | 0 | -3.271419 | -0.033066 | 0.001834  |
| 25 | 1 | 0 | 2.665582  | 4.605443  | 0.019990  |
| 26 | 6 | 0 | -3.962402 | 1.185826  | -0.050312 |
| 27 | 6 | 0 | -4.003307 | -1.226568 | 0.052579  |
| 28 | 6 | 0 | -5.350708 | 1.208484  | -0.053100 |
| 29 | 1 | 0 | -3.391247 | 2.107876  | -0.089048 |
| 30 | 6 | 0 | -5.393903 | -1.198912 | 0.048571  |
| 31 | 1 | 0 | -3.501970 | -2.189391 | 0.100804  |
| 32 | 6 | 0 | -6.072876 | 0.016328  | -0.004452 |
| 33 | 1 | 0 | -5.872409 | 2.160579  | -0.094418 |
| 34 | 1 | 0 | -5.947553 | -2.132576 | 0.088832  |
| 35 | 1 | 0 | -7.159012 | 0.034565  | -0.007197 |

### **Cu<sup>2+</sup>(2-Phen)<sub>2</sub>**

|    |    |   |            |           |           |
|----|----|---|------------|-----------|-----------|
| 1  | 29 | 0 | -0.000034  | 0.048212  | -0.000154 |
| 2  | 7  | 0 | -1.619832  | -0.889001 | -0.922497 |
| 3  | 6  | 0 | -2.812443  | -0.446769 | -0.465369 |
| 4  | 6  | 0 | -1.604464  | -1.830814 | -1.858509 |
| 5  | 6  | 0 | -2.793463  | 0.584582  | 0.561801  |
| 6  | 6  | 0 | -4.033585  | -0.957235 | -0.955943 |
| 7  | 1  | 0 | -0.624843  | -2.157638 | -2.195341 |
| 8  | 6  | 0 | -2.768786  | -2.391237 | -2.400262 |
| 9  | 6  | 0 | -4.000071  | 1.106195  | 1.099196  |
| 10 | 7  | 0 | -1.585529  | 1.018384  | 0.977979  |
| 11 | 6  | 0 | -3.994796  | -1.951571 | -1.945983 |
| 12 | 6  | 0 | -5.244868  | -0.424539 | -0.408536 |
| 13 | 1  | 0 | -2.692186  | -3.158158 | -3.163764 |
| 14 | 6  | 0 | -3.903408  | 2.099524  | 2.090635  |
| 15 | 6  | 0 | -5.208228  | 0.564805  | 0.576492  |
| 16 | 6  | 0 | -1.521344  | 1.957153  | 1.914794  |
| 17 | 1  | 0 | -4.927254  | -2.352263 | -2.331349 |
| 18 | 7  | 0 | -6.519508  | -0.756790 | -0.721530 |
| 19 | 6  | 0 | -2.658426  | 2.526841  | 2.500816  |
| 20 | 1  | 0 | -4.799014  | 2.528267  | 2.532049  |
| 21 | 7  | 0 | -6.521281  | 0.823248  | 0.853249  |
| 22 | 1  | 0 | -0.526126  | 2.271728  | 2.215079  |
| 23 | 6  | 0 | -7.284731  | 0.006068  | 0.049728  |
| 24 | 1  | 0 | -2.549335  | 3.290423  | 3.263500  |
| 25 | 1  | 0 | -6.871941  | 1.490551  | 1.522510  |
| 26 | 6  | 0 | -8.727983  | -0.017619 | 0.046689  |
| 27 | 6  | 0 | -9.388068  | -0.902252 | -0.830555 |
| 28 | 6  | 0 | -9.516529  | 0.800107  | 0.877900  |
| 29 | 6  | 0 | -10.759326 | -0.970000 | -0.879108 |
| 30 | 1  | 0 | -8.786560  | -1.535738 | -1.473893 |
| 31 | 6  | 0 | -10.891354 | 0.745084  | 0.842021  |
| 32 | 1  | 0 | -9.057829  | 1.498804  | 1.572885  |

|    |   |   |            |           |           |
|----|---|---|------------|-----------|-----------|
| 33 | 6 | 0 | -11.560472 | -0.145477 | -0.041758 |
| 34 | 1 | 0 | -11.224183 | -1.664340 | -1.568368 |
| 35 | 1 | 0 | -11.458661 | 1.392287  | 1.499633  |
| 36 | 7 | 0 | -12.914353 | -0.205656 | -0.083885 |
| 37 | 6 | 0 | -13.717679 | 0.643867  | 0.777712  |
| 38 | 6 | 0 | -13.582504 | -1.122321 | -0.991457 |
| 39 | 1 | 0 | -14.772809 | 0.448094  | 0.591715  |
| 40 | 1 | 0 | -13.513241 | 0.440237  | 1.835494  |
| 41 | 1 | 0 | -13.526032 | 1.704462  | 0.576553  |
| 42 | 1 | 0 | -14.660444 | -1.019740 | -0.874429 |
| 43 | 1 | 0 | -13.328064 | -0.900729 | -2.034542 |
| 44 | 1 | 0 | -13.311086 | -2.161854 | -0.773300 |
| 45 | 7 | 0 | 1.585584   | 1.018551  | -0.978039 |
| 46 | 6 | 0 | 1.521435   | 1.957772  | -1.914402 |
| 47 | 6 | 0 | 2.793500   | 0.584833  | -0.561737 |
| 48 | 6 | 0 | 2.658546   | 2.528016  | -2.499830 |
| 49 | 1 | 0 | 0.526230   | 2.272270  | -2.214810 |
| 50 | 6 | 0 | 4.000131   | 1.106856  | -1.098676 |
| 51 | 6 | 0 | 2.812429   | -0.446810 | 0.465140  |
| 52 | 6 | 0 | 3.903514   | 2.100685  | -2.089617 |
| 53 | 1 | 0 | 2.549490   | 3.292027  | -3.262089 |
| 54 | 6 | 0 | 5.208262   | 0.565336  | -0.576051 |
| 55 | 6 | 0 | 4.033549   | -0.957282 | 0.955764  |
| 56 | 7 | 0 | 1.619792   | -0.889320 | 0.921924  |
| 57 | 1 | 0 | 4.799141   | 2.529842  | -2.530584 |
| 58 | 6 | 0 | 5.244859   | -0.424330 | 0.408656  |
| 59 | 7 | 0 | 6.521325   | 0.823959  | -0.852580 |
| 60 | 6 | 0 | 3.994705   | -1.951894 | 1.945524  |
| 61 | 6 | 0 | 1.604372   | -1.831419 | 1.857649  |
| 62 | 7 | 0 | 6.519488   | -0.756642 | 0.721634  |
| 63 | 6 | 0 | 7.284742   | 0.006474  | -0.049337 |
| 64 | 1 | 0 | 6.871997   | 1.491030  | -1.522065 |
| 65 | 6 | 0 | 2.768666   | -2.391850 | 2.399451  |
| 66 | 1 | 0 | 4.927142   | -2.352589 | 2.330937  |
| 67 | 1 | 0 | 0.624727   | -2.158530 | 2.194132  |
| 68 | 6 | 0 | 8.727992   | -0.017294 | -0.046345 |
| 69 | 1 | 0 | 2.692027   | -3.159018 | 3.162701  |
| 70 | 6 | 0 | 9.388050   | -0.902735 | 0.830102  |
| 71 | 6 | 0 | 9.516561   | 0.801018  | -0.876961 |
| 72 | 6 | 0 | 10.759304  | -0.970711 | 0.878452  |
| 73 | 1 | 0 | 8.786521   | -1.536714 | 1.472936  |
| 74 | 6 | 0 | 10.891382  | 0.745791  | -0.841258 |
| 75 | 1 | 0 | 9.057883   | 1.500371  | -1.571301 |
| 76 | 6 | 0 | 11.560473  | -0.145594 | 0.041709  |
| 77 | 1 | 0 | 11.224136  | -1.665705 | 1.567068  |
| 78 | 1 | 0 | 11.458708  | 1.393441  | -1.498413 |
| 79 | 7 | 0 | 12.914350  | -0.205977 | 0.083646  |
| 80 | 6 | 0 | 13.717695  | 0.644079  | -0.777413 |
| 81 | 6 | 0 | 13.582479  | -1.123767 | 0.990096  |
| 82 | 1 | 0 | 14.772823  | 0.448446  | -0.591258 |
| 83 | 1 | 0 | 13.513512  | 0.440887  | -1.835333 |
| 84 | 1 | 0 | 13.525812  | 1.704542  | -0.575810 |
| 85 | 1 | 0 | 14.660417  | -1.021377 | 0.872888  |
| 86 | 1 | 0 | 13.328395  | -0.903175 | 2.033481  |
| 87 | 1 | 0 | 13.310695  | -2.162998 | 0.770951  |

**Cu<sup>2+</sup>(1-Phen)<sub>2</sub>**

|   |    |   |          |           |           |
|---|----|---|----------|-----------|-----------|
| 1 | 29 | 0 | 0.000000 | 0.000000  | 0.189881  |
| 2 | 7  | 0 | 1.505000 | -1.245823 | -0.285432 |
| 3 | 6  | 0 | 2.713900 | -0.654895 | -0.134197 |
| 4 | 6  | 0 | 1.431877 | -2.469598 | -0.794344 |

|    |   |   |            |           |           |
|----|---|---|------------|-----------|-----------|
| 5  | 6 | 0 | 2.719622   | 0.690142  | 0.378782  |
| 6  | 6 | 0 | 3.911402   | -1.318563 | -0.462892 |
| 7  | 1 | 0 | 0.440648   | -2.891633 | -0.921552 |
| 8  | 6 | 0 | 2.575862   | -3.192346 | -1.158194 |
| 9  | 6 | 0 | 3.926787   | 1.384269  | 0.623996  |
| 10 | 7 | 0 | 1.512748   | 1.250917  | 0.620250  |
| 11 | 6 | 0 | 3.819232   | -2.621376 | -0.983935 |
| 12 | 6 | 0 | 5.130818   | -0.605753 | -0.242853 |
| 13 | 1 | 0 | 2.465581   | -4.190080 | -1.567016 |
| 14 | 6 | 0 | 3.831008   | 2.676841  | 1.176374  |
| 15 | 6 | 0 | 5.119809   | 0.685570  | 0.284039  |
| 16 | 6 | 0 | 1.440405   | 2.465780  | 1.150014  |
| 17 | 1 | 0 | 4.727018   | -3.155259 | -1.245971 |
| 18 | 7 | 0 | 6.402404   | -1.023809 | -0.482256 |
| 19 | 6 | 0 | 2.588672   | 3.209768  | 1.448190  |
| 20 | 1 | 0 | 4.726317   | 3.249820  | 1.395930  |
| 21 | 7 | 0 | 6.436993   | 1.038144  | 0.357295  |
| 22 | 1 | 0 | 0.449290   | 2.860279  | 1.347024  |
| 23 | 6 | 0 | 7.176118   | -0.014021 | -0.114020 |
| 24 | 1 | 0 | 2.485735   | 4.197052  | 1.883065  |
| 25 | 1 | 0 | 6.800946   | 1.927659  | 0.666562  |
| 26 | 6 | 0 | 8.634581   | -0.012194 | -0.200832 |
| 27 | 6 | 0 | 9.267965   | -1.101706 | -0.815168 |
| 28 | 6 | 0 | 9.414217   | 1.035172  | 0.307164  |
| 29 | 6 | 0 | 10.652074  | -1.139222 | -0.921196 |
| 30 | 1 | 0 | 8.658634   | -1.910107 | -1.206230 |
| 31 | 6 | 0 | 10.799838  | 0.992996  | 0.197229  |
| 32 | 1 | 0 | 8.956343   | 1.887822  | 0.800827  |
| 33 | 6 | 0 | 11.422797  | -0.091808 | -0.416854 |
| 34 | 1 | 0 | 11.131843  | -1.987687 | -1.400516 |
| 35 | 1 | 0 | 11.393650  | 1.810212  | 0.595878  |
| 36 | 7 | 0 | -1.512749  | -1.250940 | 0.620271  |
| 37 | 6 | 0 | -1.440417  | -2.465807 | 1.150017  |
| 38 | 6 | 0 | -2.719624  | -0.690130 | 0.378850  |
| 39 | 6 | 0 | -2.588691  | -3.209776 | 1.448229  |
| 40 | 1 | 0 | -0.449306  | -2.860339 | 1.346980  |
| 41 | 6 | 0 | -3.926792  | -1.384242 | 0.624089  |
| 42 | 6 | 0 | -2.713897  | 0.654909  | -0.134110 |
| 43 | 6 | 0 | -3.831021  | -2.676822 | 1.176456  |
| 44 | 1 | 0 | -2.485753  | -4.197063 | 1.883095  |
| 45 | 6 | 0 | -5.119816  | -0.685533 | 0.284164  |
| 46 | 6 | 0 | -3.911398  | 1.318590  | -0.462782 |
| 47 | 7 | 0 | -1.504992  | 1.245838  | -0.285362 |
| 48 | 1 | 0 | -4.726338  | -3.249780 | 1.396036  |
| 49 | 6 | 0 | -5.130817  | 0.605791  | -0.242733 |
| 50 | 7 | 0 | -6.436998  | -1.038100 | 0.357417  |
| 51 | 6 | 0 | -3.819231  | 2.621406  | -0.983824 |
| 52 | 6 | 0 | -1.431875  | 2.469609  | -0.794274 |
| 53 | 7 | 0 | -6.402399  | 1.023858  | -0.482129 |
| 54 | 6 | 0 | -7.176114  | 0.014046  | -0.113959 |
| 55 | 1 | 0 | -6.800966  | -1.927590 | 0.666740  |
| 56 | 6 | 0 | -2.575863  | 3.192367  | -1.158104 |
| 57 | 1 | 0 | -4.727024  | 3.155287  | -1.245841 |
| 58 | 1 | 0 | -0.440648  | 2.891645  | -0.921497 |
| 59 | 6 | 0 | -8.634571  | 0.012191  | -0.200846 |
| 60 | 1 | 0 | -2.465575  | 4.190101  | -1.566924 |
| 61 | 6 | 0 | -9.267941  | 1.101635  | -0.815317 |
| 62 | 6 | 0 | -9.414212  | -1.035144 | 0.307206  |
| 63 | 6 | 0 | -10.652045 | 1.139118  | -0.921416 |
| 64 | 1 | 0 | -8.658602  | 1.910008  | -1.206425 |
| 65 | 6 | 0 | -10.799828 | -0.993002 | 0.197197  |
| 66 | 1 | 0 | -8.956341  | -1.887737 | 0.800970  |
| 67 | 6 | 0 | -11.422774 | 0.091738  | -0.417013 |
| 68 | 1 | 0 | -11.131806 | 1.987527  | -1.400842 |

|    |   |   |            |           |           |
|----|---|---|------------|-----------|-----------|
| 69 | 1 | 0 | -11.393648 | -1.810191 | 0.595889  |
| 70 | 1 | 0 | 12.505347  | -0.121415 | -0.500841 |
| 71 | 1 | 0 | -12.505320 | 0.121317  | -0.501059 |

**Cu<sup>2+</sup>(2-Phen)(2-Im)<sub>2</sub>**

|    |    |   |            |           |           |
|----|----|---|------------|-----------|-----------|
| 1  | 29 | 0 | 0.709309   | 0.268305  | -0.108205 |
| 2  | 7  | 0 | -0.851253  | 0.905590  | 1.034401  |
| 3  | 6  | 0 | -2.049232  | 0.684922  | 0.441098  |
| 4  | 6  | 0 | -0.809158  | 1.430496  | 2.252554  |
| 5  | 6  | 0 | -2.020068  | 0.124812  | -0.880604 |
| 6  | 6  | 0 | -3.266008  | 0.998611  | 1.079027  |
| 7  | 1  | 0 | 0.174044   | 1.596955  | 2.678398  |
| 8  | 6  | 0 | -1.974052  | 1.762476  | 2.957927  |
| 9  | 6  | 0 | -3.209505  | -0.126146 | -1.604732 |
| 10 | 7  | 0 | -0.798193  | -0.142339 | -1.394822 |
| 11 | 6  | 0 | -3.204341  | 1.548419  | 2.372151  |
| 12 | 6  | 0 | -4.468220  | 0.736061  | 0.352818  |
| 13 | 1  | 0 | -1.889206  | 2.186880  | 3.951736  |
| 14 | 6  | 0 | -3.073569  | -0.666634 | -2.900051 |
| 15 | 6  | 0 | -4.420013  | 0.200446  | -0.935191 |
| 16 | 6  | 0 | -0.687212  | -0.640649 | -2.618392 |
| 17 | 1  | 0 | -4.125708  | 1.798533  | 2.888262  |
| 18 | 7  | 0 | -5.751291  | 0.948824  | 0.747647  |
| 19 | 6  | 0 | -1.814895  | -0.913916 | -3.404904 |
| 20 | 1  | 0 | -3.951594  | -0.887912 | -3.498909 |
| 21 | 7  | 0 | -5.729881  | 0.097885  | -1.311945 |
| 22 | 1  | 0 | 0.317097   | -0.834351 | -2.977399 |
| 23 | 6  | 0 | -6.503108  | 0.555726  | -0.274693 |
| 24 | 1  | 0 | -1.682254  | -1.322928 | -4.399855 |
| 25 | 1  | 0 | -6.070202  | -0.233316 | -2.202292 |
| 26 | 6  | 0 | -7.952851  | 0.596061  | -0.301983 |
| 27 | 6  | 0 | -8.644871  | 1.133600  | 0.795412  |
| 28 | 6  | 0 | -8.714533  | 0.115399  | -1.377989 |
| 29 | 6  | 0 | -10.023764 | 1.193459  | 0.823237  |
| 30 | 1  | 0 | -8.074557  | 1.509690  | 1.639334  |
| 31 | 6  | 0 | -10.096004 | 0.167589  | -1.365568 |
| 32 | 1  | 0 | -8.236056  | -0.318937 | -2.252367 |
| 33 | 6  | 0 | -10.797539 | 0.710307  | -0.261320 |
| 34 | 1  | 0 | -10.509181 | 1.618332  | 1.694175  |
| 35 | 1  | 0 | -10.637671 | -0.218188 | -2.221157 |
| 36 | 7  | 0 | -12.159945 | 0.763890  | -0.242523 |
| 37 | 6  | 0 | -12.921697 | 0.251485  | -1.361026 |
| 38 | 6  | 0 | -12.848775 | 1.325790  | 0.899304  |
| 39 | 1  | 0 | -13.985195 | 0.374908  | -1.155591 |
| 40 | 1  | 0 | -12.690894 | 0.789231  | -2.290267 |
| 41 | 1  | 0 | -12.730058 | -0.817011 | -1.526832 |
| 42 | 1  | 0 | -13.923842 | 1.285934  | 0.722825  |
| 43 | 1  | 0 | -12.634792 | 0.766158  | 1.819641  |
| 44 | 1  | 0 | -12.571192 | 2.375255  | 1.063987  |
| 45 | 7  | 0 | 7.156047   | -0.953457 | -3.034375 |
| 46 | 6  | 0 | 7.775660   | -2.116555 | -3.136368 |
| 47 | 6  | 0 | 5.889104   | -0.939219 | -2.581928 |
| 48 | 6  | 0 | 7.191439   | -3.349556 | -2.804958 |
| 49 | 1  | 0 | 8.800256   | -2.085416 | -3.503540 |
| 50 | 6  | 0 | 5.215232   | -2.131389 | -2.209704 |
| 51 | 6  | 0 | 5.196881   | 0.350699  | -2.513300 |
| 52 | 6  | 0 | 5.896861   | -3.355186 | -2.335051 |
| 53 | 1  | 0 | 7.753572   | -4.270713 | -2.916545 |
| 54 | 6  | 0 | 3.887364   | -1.990041 | -1.712150 |
| 55 | 6  | 0 | 3.859753   | 0.430721  | -2.033900 |
| 56 | 7  | 0 | 5.860589   | 1.434837  | -2.954875 |

|     |   |   |           |           |           |
|-----|---|---|-----------|-----------|-----------|
| 57  | 1 | 0 | 5.415484  | -4.290920 | -2.065673 |
| 58  | 6 | 0 | 3.245833  | -0.775207 | -1.562681 |
| 59  | 7 | 0 | 2.999354  | -2.934643 | -1.270220 |
| 60  | 6 | 0 | 3.210754  | 1.673009  | -2.117268 |
| 61  | 6 | 0 | 5.234826  | 2.598632  | -2.973730 |
| 62  | 7 | 0 | 1.998971  | -0.992091 | -1.004330 |
| 63  | 6 | 0 | 1.870592  | -2.319725 | -0.847916 |
| 64  | 1 | 0 | 3.166537  | -3.927121 | -1.181979 |
| 65  | 6 | 0 | 3.897283  | 2.770581  | -2.587623 |
| 66  | 1 | 0 | 2.166309  | 1.763378  | -1.839342 |
| 67  | 1 | 0 | 5.810676  | 3.450680  | -3.331350 |
| 68  | 6 | 0 | 0.709028  | -3.066657 | -0.396074 |
| 69  | 1 | 0 | 3.420244  | 3.742066  | -2.665759 |
| 70  | 6 | 0 | 0.379372  | -4.280264 | -1.023934 |
| 71  | 6 | 0 | -0.129435 | -2.627781 | 0.638164  |
| 72  | 6 | 0 | -0.732826 | -5.009295 | -0.651642 |
| 73  | 1 | 0 | 0.982536  | -4.645219 | -1.851142 |
| 74  | 6 | 0 | -1.249025 | -3.340961 | 1.021205  |
| 75  | 1 | 0 | 0.120934  | -1.736173 | 1.207259  |
| 76  | 6 | 0 | -1.590516 | -4.559552 | 0.383203  |
| 77  | 1 | 0 | -0.948552 | -5.929648 | -1.181203 |
| 78  | 1 | 0 | -1.850479 | -2.962043 | 1.838920  |
| 79  | 7 | 0 | -2.691651 | -5.268549 | 0.750843  |
| 80  | 6 | 0 | -3.570443 | -4.762360 | 1.784368  |
| 81  | 6 | 0 | -3.001524 | -6.520996 | 0.093420  |
| 82  | 1 | 0 | -4.407173 | -5.449616 | 1.909058  |
| 83  | 1 | 0 | -3.055025 | -4.676301 | 2.749986  |
| 84  | 1 | 0 | -3.976660 | -3.776956 | 1.521241  |
| 85  | 1 | 0 | -3.898644 | -6.947246 | 0.542366  |
| 86  | 1 | 0 | -3.191251 | -6.381706 | -0.979162 |
| 87  | 1 | 0 | -2.187306 | -7.247761 | 0.207917  |
| 88  | 6 | 0 | 5.721871  | 5.847715  | 2.395904  |
| 89  | 6 | 0 | 4.939447  | 6.837883  | 1.780039  |
| 90  | 6 | 0 | 3.376335  | 5.323837  | 1.063930  |
| 91  | 6 | 0 | 4.093332  | 4.254481  | 1.656389  |
| 92  | 6 | 0 | 5.292041  | 4.540894  | 2.333146  |
| 93  | 6 | 0 | 2.129408  | 5.062750  | 0.339497  |
| 94  | 6 | 0 | 0.397407  | 5.921126  | -0.900084 |
| 95  | 1 | 0 | -0.065763 | 6.804262  | -1.336883 |
| 96  | 6 | 0 | -0.191394 | 4.661104  | -1.076318 |
| 97  | 6 | 0 | 0.423403  | 3.570822  | -0.501356 |
| 98  | 6 | 0 | 1.608940  | 3.741334  | 0.234326  |
| 99  | 6 | 0 | 2.344377  | 2.682467  | 0.865839  |
| 100 | 6 | 0 | 3.531650  | 2.951637  | 1.520955  |
| 101 | 1 | 0 | 6.640659  | 6.113935  | 2.907620  |
| 102 | 1 | 0 | 5.257267  | 7.878577  | 1.818043  |
| 103 | 1 | 0 | 5.871284  | 3.748798  | 2.798652  |
| 104 | 1 | 0 | -1.106198 | 4.552990  | -1.649402 |
| 105 | 1 | 0 | -0.020369 | 2.587820  | -0.615549 |
| 106 | 7 | 0 | 1.513947  | 6.118489  | -0.222291 |
| 107 | 7 | 0 | 3.810497  | 6.595359  | 1.136904  |
| 108 | 6 | 0 | 3.114807  | 0.776037  | 1.616799  |
| 109 | 7 | 0 | 2.101704  | 1.315569  | 0.926952  |
| 110 | 7 | 0 | 3.989716  | 1.742317  | 1.970569  |
| 111 | 1 | 0 | 4.801236  | 1.575487  | 2.549868  |
| 112 | 6 | 0 | 3.318839  | -0.618935 | 1.990373  |
| 113 | 6 | 0 | 2.364951  | -1.326801 | 2.734170  |
| 114 | 6 | 0 | 4.524137  | -1.265647 | 1.675630  |
| 115 | 6 | 0 | 2.582128  | -2.637938 | 3.117522  |
| 116 | 1 | 0 | 1.455912  | -0.831117 | 3.064509  |
| 117 | 6 | 0 | 4.751176  | -2.578033 | 2.046465  |

|     |   |   |          |           |          |
|-----|---|---|----------|-----------|----------|
| 118 | 1 | 0 | 5.287722 | -0.739328 | 1.108327 |
| 119 | 6 | 0 | 3.779010 | -3.311717 | 2.770945 |
| 120 | 1 | 0 | 1.821132 | -3.138802 | 3.704043 |
| 121 | 1 | 0 | 5.689781 | -3.041125 | 1.765811 |
| 122 | 7 | 0 | 3.990538 | -4.609480 | 3.127134 |
| 123 | 6 | 0 | 5.233552 | -5.264218 | 2.778859 |
| 124 | 6 | 0 | 2.977455 | -5.333781 | 3.864691 |
| 125 | 1 | 0 | 5.209921 | -6.291579 | 3.142486 |
| 126 | 1 | 0 | 5.385025 | -5.293073 | 1.691658 |
| 127 | 1 | 0 | 6.098623 | -4.763097 | 3.232783 |
| 128 | 1 | 0 | 3.317939 | -6.356332 | 4.028221 |
| 129 | 1 | 0 | 2.784083 | -4.879443 | 4.845550 |
| 130 | 1 | 0 | 2.029516 | -5.376106 | 3.312381 |

**Cu<sup>2+</sup>(2- Im)<sub>4</sub>**

|    |    |   |           |           |           |
|----|----|---|-----------|-----------|-----------|
| 1  | 29 | 0 | 0.000009  | -0.437285 | 0.000006  |
| 2  | 7  | 0 | -2.937584 | -4.513976 | 3.606631  |
| 3  | 6  | 0 | -3.235201 | -3.405727 | 2.905210  |
| 4  | 6  | 0 | -1.669981 | -4.831415 | 3.800569  |
| 5  | 6  | 0 | -4.653741 | -3.084183 | 2.752172  |
| 6  | 6  | 0 | -2.225486 | -2.568563 | 2.344444  |
| 7  | 1  | 0 | -1.479868 | -5.741010 | 4.368013  |
| 8  | 6  | 0 | -0.602262 | -4.056785 | 3.330598  |
| 9  | 6  | 0 | -5.033492 | -1.915187 | 2.052472  |
| 10 | 7  | 0 | -5.561746 | -3.913358 | 3.299259  |
| 11 | 6  | 0 | -0.893341 | -2.922410 | 2.604257  |
| 12 | 6  | 0 | -2.635037 | -1.418573 | 1.578881  |
| 13 | 1  | 0 | 0.423956  | -4.341754 | 3.538980  |
| 14 | 6  | 0 | -6.402999 | -1.619125 | 1.928832  |
| 15 | 6  | 0 | -3.984510 | -1.122884 | 1.503845  |
| 16 | 6  | 0 | -6.842133 | -3.612863 | 3.169692  |
| 17 | 1  | 0 | -0.103233 | -2.274702 | 2.256705  |
| 18 | 7  | 0 | -1.919880 | -0.439555 | 0.873700  |
| 19 | 6  | 0 | -7.319206 | -2.477598 | 2.494283  |
| 20 | 1  | 0 | -6.737973 | -0.736198 | 1.392266  |
| 21 | 7  | 0 | -4.074034 | 0.044113  | 0.803196  |
| 22 | 1  | 0 | -7.547641 | -4.307030 | 3.623567  |
| 23 | 6  | 0 | -2.834638 | 0.452849  | 0.453554  |
| 24 | 1  | 0 | -8.385294 | -2.290295 | 2.421514  |
| 25 | 1  | 0 | -4.902094 | 0.608582  | 0.673685  |
| 26 | 6  | 0 | -2.701165 | 1.748040  | -0.200829 |
| 27 | 6  | 0 | -1.781579 | 2.712170  | 0.235983  |
| 28 | 6  | 0 | -3.683875 | 2.154701  | -1.122727 |
| 29 | 6  | 0 | -1.844551 | 4.018541  | -0.212623 |
| 30 | 1  | 0 | -1.042422 | 2.457442  | 0.988027  |
| 31 | 6  | 0 | -3.745201 | 3.451903  | -1.593526 |
| 32 | 1  | 0 | -4.411440 | 1.435517  | -1.491727 |
| 33 | 6  | 0 | -2.832594 | 4.436374  | -1.136495 |
| 34 | 1  | 0 | -1.137999 | 4.733195  | 0.189992  |
| 35 | 1  | 0 | -4.513725 | 3.707931  | -2.313048 |
| 36 | 7  | 0 | -2.904978 | 5.725631  | -1.566598 |
| 37 | 6  | 0 | -3.952792 | 6.128490  | -2.481833 |
| 38 | 6  | 0 | -1.948878 | 6.703649  | -1.092418 |
| 39 | 1  | 0 | -3.860065 | 7.195777  | -2.682504 |
| 40 | 1  | 0 | -3.882757 | 5.596005  | -3.439431 |
| 41 | 1  | 0 | -4.949445 | 5.947758  | -2.059047 |
| 42 | 1  | 0 | -2.162853 | 7.666475  | -1.556540 |
| 43 | 1  | 0 | -2.002883 | 6.832474  | -0.002948 |
| 44 | 1  | 0 | -0.920389 | 6.422420  | -1.355951 |
| 45 | 7  | 0 | 5.850608  | -2.675679 | 3.514843  |

|     |   |   |           |           |           |
|-----|---|---|-----------|-----------|-----------|
| 46  | 6 | 0 | 6.533579  | -2.007298 | 4.427941  |
| 47  | 6 | 0 | 4.660887  | -2.185954 | 3.120339  |
| 48  | 6 | 0 | 6.093118  | -0.813055 | 5.021406  |
| 49  | 1 | 0 | 7.493156  | -2.432487 | 4.717731  |
| 50  | 6 | 0 | 4.134351  | -0.983586 | 3.653178  |
| 51  | 6 | 0 | 3.889801  | -2.947420 | 2.135867  |
| 52  | 6 | 0 | 4.878762  | -0.296215 | 4.628399  |
| 53  | 1 | 0 | 6.702157  | -0.313975 | 5.767625  |
| 54  | 6 | 0 | 2.875665  | -0.550924 | 3.143418  |
| 55  | 6 | 0 | 2.648419  | -2.452326 | 1.642015  |
| 56  | 7 | 0 | 4.388185  | -4.136159 | 1.751664  |
| 57  | 1 | 0 | 4.510552  | 0.629723  | 5.060311  |
| 58  | 6 | 0 | 2.179470  | -1.186311 | 2.133531  |
| 59  | 7 | 0 | 2.093617  | 0.504317  | 3.520663  |
| 60  | 6 | 0 | 1.932239  | -3.282598 | 0.766382  |
| 61  | 6 | 0 | 3.687410  | -4.884326 | 0.918252  |
| 62  | 7 | 0 | 1.001830  | -0.480873 | 1.875076  |
| 63  | 6 | 0 | 0.967605  | 0.519117  | 2.774514  |
| 64  | 1 | 0 | 2.250577  | 1.132128  | 4.297098  |
| 65  | 6 | 0 | 2.437677  | -4.511195 | 0.405144  |
| 66  | 1 | 0 | 0.970383  | -2.963587 | 0.379725  |
| 67  | 1 | 0 | 4.127273  | -5.840071 | 0.638692  |
| 68  | 6 | 0 | -0.062474 | 1.507471  | 3.080882  |
| 69  | 1 | 0 | 1.893580  | -5.168829 | -0.264552 |
| 70  | 6 | 0 | -1.368032 | 1.134815  | 3.431849  |
| 71  | 6 | 0 | 0.291140  | 2.859884  | 3.211525  |
| 72  | 6 | 0 | -2.301503 | 2.075421  | 3.824555  |
| 73  | 1 | 0 | -1.647976 | 0.087717  | 3.430696  |
| 74  | 6 | 0 | -0.633803 | 3.812823  | 3.595810  |
| 75  | 1 | 0 | 1.303989  | 3.175038  | 2.977545  |
| 76  | 6 | 0 | -1.970648 | 3.451921  | 3.894784  |
| 77  | 1 | 0 | -3.293934 | 1.736427  | 4.097797  |
| 78  | 1 | 0 | -0.316041 | 4.846666  | 3.663976  |
| 79  | 7 | 0 | -2.895082 | 4.386638  | 4.248480  |
| 80  | 6 | 0 | -2.523089 | 5.783599  | 4.320461  |
| 81  | 6 | 0 | -4.249341 | 3.985439  | 4.565614  |
| 82  | 1 | 0 | -3.399155 | 6.373363  | 4.590688  |
| 83  | 1 | 0 | -1.747571 | 5.961598  | 5.077257  |
| 84  | 1 | 0 | -2.151482 | 6.150906  | 3.354411  |
| 85  | 1 | 0 | -4.840645 | 4.872515  | 4.792971  |
| 86  | 1 | 0 | -4.724217 | 3.468503  | 3.721561  |
| 87  | 1 | 0 | -4.283916 | 3.321071  | 5.439243  |
| 88  | 6 | 0 | 7.319652  | -2.476413 | -2.494163 |
| 89  | 6 | 0 | 6.842754  | -3.611705 | -3.169652 |
| 90  | 6 | 0 | 4.654276  | -3.083268 | -2.752287 |
| 91  | 6 | 0 | 5.033848  | -1.914280 | -2.052477 |
| 92  | 6 | 0 | 6.403315  | -1.618069 | -1.928729 |
| 93  | 6 | 0 | 3.235780  | -3.404926 | -2.905483 |
| 94  | 6 | 0 | 1.670776  | -4.830610 | -3.801234 |
| 95  | 1 | 0 | 1.480804  | -5.740158 | -4.368799 |
| 96  | 6 | 0 | 0.602938  | -4.056104 | -3.331320 |
| 97  | 6 | 0 | 0.893841  | -2.921810 | -2.604783 |
| 98  | 6 | 0 | 2.225932  | -2.567914 | -2.344733 |
| 99  | 6 | 0 | 2.635298  | -1.417981 | -1.578987 |
| 100 | 6 | 0 | 3.984738  | -1.122145 | -1.503856 |
| 101 | 1 | 0 | 8.385714  | -2.288992 | -2.421317 |
| 102 | 1 | 0 | 7.548374  | -4.305771 | -3.623506 |
| 103 | 1 | 0 | 6.738163  | -0.735132 | -1.392101 |
| 104 | 1 | 0 | -0.423229 | -4.341103 | -3.539906 |
| 105 | 1 | 0 | 0.103650  | -2.274189 | -2.257250 |
| 106 | 7 | 0 | 2.938329  | -4.513107 | -3.607082 |



|     |   |   |           |           |           |
|-----|---|---|-----------|-----------|-----------|
| 107 | 7 | 0 | 5.562409  | -3.912327 | -3.299343 |
| 108 | 6 | 0 | 2.834632  | 0.453386  | -0.453539 |
| 109 | 7 | 0 | 1.919997  | -0.439083 | -0.873781 |
| 110 | 7 | 0 | 4.074101  | 0.044798  | -0.803093 |
| 111 | 1 | 0 | 4.902093  | 0.609344  | -0.673489 |
| 112 | 6 | 0 | 2.700926  | 1.748530  | 0.200876  |
| 113 | 6 | 0 | 1.781113  | 2.712460  | -0.235897 |
| 114 | 6 | 0 | 3.683521  | 2.155359  | 1.122816  |
| 115 | 6 | 0 | 1.843781  | 4.018823  | 0.212762  |
| 116 | 1 | 0 | 1.042008  | 2.457570  | -0.987940 |
| 117 | 6 | 0 | 3.744538  | 3.452554  | 1.593679  |
| 118 | 1 | 0 | 4.411203  | 1.436308  | 1.491848  |
| 119 | 6 | 0 | 2.831743  | 4.436843  | 1.136641  |
| 120 | 1 | 0 | 1.137047  | 4.733325  | -0.189804 |
| 121 | 1 | 0 | 4.512960  | 3.708716  | 2.313262  |
| 122 | 6 | 0 | -6.092893 | -0.813437 | -5.021612 |
| 123 | 6 | 0 | -6.533213 | -2.007752 | -4.428190 |
| 124 | 6 | 0 | -4.660511 | -2.186224 | -3.120578 |
| 125 | 6 | 0 | -4.134117 | -0.983775 | -3.653373 |
| 126 | 6 | 0 | -4.878605 | -0.296460 | -4.628575 |
| 127 | 6 | 0 | -3.889334 | -2.947644 | -2.136136 |
| 128 | 6 | 0 | -3.686689 | -4.884585 | -0.918625 |
| 129 | 1 | 0 | -4.126440 | -5.840391 | -0.639098 |
| 130 | 6 | 0 | -2.436977 | -4.511349 | -0.405549 |
| 131 | 6 | 0 | -1.931688 | -3.282673 | -0.766739 |
| 132 | 6 | 0 | -2.648002 | -2.452425 | -1.642278 |
| 133 | 6 | 0 | -2.179236 | -1.186311 | -2.133709 |
| 134 | 6 | 0 | -2.875494 | -0.550968 | -3.143576 |
| 135 | 1 | 0 | -6.701988 | -0.314408 | -5.767819 |
| 136 | 1 | 0 | -7.492737 | -2.433048 | -4.717999 |
| 137 | 1 | 0 | -4.510503 | 0.629538  | -5.060447 |
| 138 | 1 | 0 | -1.892777 | -5.168956 | 0.264087  |
| 139 | 1 | 0 | -0.969838 | -2.963579 | -0.380129 |
| 140 | 7 | 0 | -4.387574 | -4.136455 | -1.751985 |
| 141 | 7 | 0 | -5.850167 | -2.676080 | -3.515107 |
| 142 | 6 | 0 | -0.967595 | 0.519323  | -2.774548 |
| 143 | 7 | 0 | -1.001699 | -0.480724 | -1.875181 |
| 144 | 7 | 0 | -2.093585 | 0.504411  | -3.520735 |
| 145 | 1 | 0 | -2.250579 | 1.132204  | -4.297177 |
| 146 | 6 | 0 | 0.062318  | 1.507893  | -3.080778 |
| 147 | 6 | 0 | -0.291549 | 2.860253  | -3.211263 |
| 148 | 6 | 0 | 1.367975  | 1.135526  | -3.431674 |
| 149 | 6 | 0 | 0.633237  | 3.813417  | -3.595361 |
| 150 | 1 | 0 | -1.304472 | 3.175175  | -2.977297 |
| 151 | 6 | 0 | 2.301287  | 2.076363  | -3.824207 |
| 152 | 1 | 0 | 1.648124  | 0.088483  | -3.430594 |
| 153 | 6 | 0 | 1.970166  | 3.452804  | -3.894304 |
| 154 | 1 | 0 | 0.315283  | 4.847210  | -3.663393 |
| 155 | 1 | 0 | 3.293812  | 1.737601  | -4.097398 |
| 156 | 7 | 0 | 2.903878  | 5.726114  | 1.566739  |
| 157 | 6 | 0 | 1.947313  | 6.703841  | 1.092903  |
| 158 | 6 | 0 | 3.951307  | 6.129077  | 2.482367  |
| 159 | 1 | 0 | 2.161146  | 7.666731  | 1.556957  |
| 160 | 1 | 0 | 2.000947  | 6.832702  | 0.003423  |
| 161 | 1 | 0 | 0.918987  | 6.422288  | 1.356739  |
| 162 | 1 | 0 | 3.858471  | 7.196379  | 2.682908  |
| 163 | 1 | 0 | 3.880947  | 5.596653  | 3.439982  |
| 164 | 1 | 0 | 4.948119  | 5.948368  | 2.059960  |
| 165 | 7 | 0 | 2.894435  | 4.387742  | -4.247857 |
| 166 | 6 | 0 | 2.522187  | 5.784646  | -4.319621 |
| 167 | 6 | 0 | 4.248794  | 3.986850  | -4.564951 |

|     |   |   |          |          |           |
|-----|---|---|----------|----------|-----------|
| 168 | 1 | 0 | 3.398160 | 6.374620 | -4.589689 |
| 169 | 1 | 0 | 1.746680 | 5.962630 | -5.076435 |
| 170 | 1 | 0 | 2.150450 | 6.151718 | -3.353534 |
| 171 | 1 | 0 | 4.839925 | 4.874067 | -4.792211 |
| 172 | 1 | 0 | 4.723739 | 3.469944 | -3.720917 |
| 173 | 1 | 0 | 4.283551 | 3.322562 | -5.438633 |

**Cu<sup>+</sup>(2-Phen)<sub>2</sub>**

|    |    |   |            |           |           |
|----|----|---|------------|-----------|-----------|
| 1  | 29 | 0 | 0.000003   | 0.000712  | 0.068536  |
| 2  | 7  | 0 | -1.625489  | -0.918343 | 0.994110  |
| 3  | 6  | 0 | -2.812701  | -0.463482 | 0.530927  |
| 4  | 6  | 0 | -1.619517  | -1.856780 | 1.932439  |
| 5  | 6  | 0 | -2.780145  | 0.563983  | -0.495314 |
| 6  | 6  | 0 | -4.043431  | -0.960742 | 1.018416  |
| 7  | 1  | 0 | -0.644371  | -2.191328 | 2.274126  |
| 8  | 6  | 0 | -2.792170  | -2.404432 | 2.471428  |
| 9  | 6  | 0 | -3.980944  | 1.095215  | -1.034617 |
| 10 | 7  | 0 | -1.565523  | 0.986877  | -0.908958 |
| 11 | 6  | 0 | -4.011684  | -1.954087 | 2.011755  |
| 12 | 6  | 0 | -5.246185  | -0.418927 | 0.465643  |
| 13 | 1  | 0 | -2.725234  | -3.169721 | 3.237277  |
| 14 | 6  | 0 | -3.872714  | 2.089934  | -2.025030 |
| 15 | 6  | 0 | -5.195182  | 0.564446  | -0.516251 |
| 16 | 6  | 0 | -1.489675  | 1.925134  | -1.844024 |
| 17 | 1  | 0 | -4.946134  | -2.348409 | 2.398717  |
| 18 | 7  | 0 | -6.535494  | -0.739096 | 0.772627  |
| 19 | 6  | 0 | -2.622382  | 2.505512  | -2.430085 |
| 20 | 1  | 0 | -4.763557  | 2.526738  | -2.466019 |
| 21 | 7  | 0 | -6.506555  | 0.836826  | -0.801422 |
| 22 | 1  | 0 | -0.491371  | 2.231211  | -2.142380 |
| 23 | 6  | 0 | -7.282874  | 0.032454  | -0.006646 |
| 24 | 1  | 0 | -2.504667  | 3.269813  | -3.190531 |
| 25 | 1  | 0 | -6.844919  | 1.499356  | -1.482866 |
| 26 | 6  | 0 | -8.735887  | 0.035097  | -0.027863 |
| 27 | 6  | 0 | -9.437964  | -0.862295 | 0.791746  |
| 28 | 6  | 0 | -9.489929  | 0.899233  | -0.835113 |
| 29 | 6  | 0 | -10.818689 | -0.901747 | 0.808634  |
| 30 | 1  | 0 | -8.874183  | -1.540696 | 1.424941  |
| 31 | 6  | 0 | -10.873249 | 0.872788  | -0.830259 |
| 32 | 1  | 0 | -9.004423  | 1.620530  | -1.487894 |
| 33 | 6  | 0 | -11.584315 | -0.031725 | -0.005923 |
| 34 | 1  | 0 | -11.310791 | -1.614986 | 1.459974  |
| 35 | 1  | 0 | -11.406903 | 1.563133  | -1.473203 |
| 36 | 7  | 0 | -12.949262 | -0.063802 | 0.004149  |
| 37 | 6  | 0 | -13.701373 | 0.841003  | -0.836896 |
| 38 | 6  | 0 | -13.645769 | -1.005045 | 0.853264  |
| 39 | 1  | 0 | -14.767277 | 0.671546  | -0.682114 |
| 40 | 1  | 0 | -13.487385 | 1.891119  | -0.596803 |
| 41 | 1  | 0 | -13.483952 | 0.682934  | -1.901939 |
| 42 | 1  | 0 | -14.720477 | -0.884541 | 0.714608  |
| 43 | 1  | 0 | -13.386863 | -2.043484 | 0.606772  |
| 44 | 1  | 0 | -13.420346 | -0.839746 | 1.915468  |
| 45 | 7  | 0 | 1.565302   | -0.985597 | -0.909230 |
| 46 | 6  | 0 | 1.489226   | -1.923759 | -1.844372 |
| 47 | 6  | 0 | 2.780023   | -0.563131 | -0.495448 |
| 48 | 6  | 0 | 2.621796   | -2.504475 | -2.430364 |
| 49 | 1  | 0 | 0.490847   | -2.229467 | -2.142855 |
| 50 | 6  | 0 | 3.980698   | -1.094667 | -1.034730 |
| 51 | 6  | 0 | 2.812814   | 0.464180  | 0.530940  |
| 52 | 6  | 0 | 3.872228   | -2.089301 | -2.025202 |

|    |   |   |           |           |           |
|----|---|---|-----------|-----------|-----------|
| 53 | 1 | 0 | 2.503901  | -3.268712 | -3.190847 |
| 54 | 6 | 0 | 5.195062  | -0.564277 | -0.516267 |
| 55 | 6 | 0 | 4.043662  | 0.960997  | 1.018582  |
| 56 | 7 | 0 | 1.625708  | 0.919322  | 0.994125  |
| 57 | 1 | 0 | 4.762965  | -2.526367 | -2.466145 |
| 58 | 6 | 0 | 5.246288  | 0.418948  | 0.465765  |
| 59 | 7 | 0 | 6.506376  | -0.836918 | -0.801470 |
| 60 | 6 | 0 | 4.012155  | 1.954162  | 2.012109  |
| 61 | 6 | 0 | 1.619965  | 1.857594  | 1.932623  |
| 62 | 7 | 0 | 6.535668  | 0.738765  | 0.772815  |
| 63 | 6 | 0 | 7.282874  | -0.032842 | -0.006569 |
| 64 | 1 | 0 | 6.844597  | -1.499352 | -1.483082 |
| 65 | 6 | 0 | 2.792749  | 2.404787  | 2.471792  |
| 66 | 1 | 0 | 4.946701  | 2.348136  | 2.399193  |
| 67 | 1 | 0 | 0.644900  | 2.192408  | 2.274278  |
| 68 | 6 | 0 | 8.735885  | -0.035777 | -0.027815 |
| 69 | 1 | 0 | 2.725994  | 3.169952  | 3.237781  |
| 70 | 6 | 0 | 9.438170  | 0.861661  | 0.791564  |
| 71 | 6 | 0 | 9.489725  | -0.900245 | -0.834896 |
| 72 | 6 | 0 | 10.818904 | 0.900852  | 0.808383  |
| 73 | 1 | 0 | 8.874550  | 1.540333  | 1.424613  |
| 74 | 6 | 0 | 10.873049 | -0.874074 | -0.830101 |
| 75 | 1 | 0 | 9.004040  | -1.621600 | -1.487477 |
| 76 | 6 | 0 | 11.584327 | 0.030490  | -0.006000 |
| 77 | 1 | 0 | 11.311173 | 1.614169  | 1.459512  |
| 78 | 1 | 0 | 11.406537 | -1.564688 | -1.472892 |
| 79 | 7 | 0 | 12.949280 | 0.062314  | 0.004016  |
| 80 | 6 | 0 | 13.701203 | -0.842705 | -0.836965 |
| 81 | 6 | 0 | 13.645984 | 1.003678  | 0.852835  |
| 82 | 1 | 0 | 14.767139 | -0.673377 | -0.682268 |
| 83 | 1 | 0 | 13.487086 | -1.892759 | -0.596720 |
| 84 | 1 | 0 | 13.483739 | -0.684746 | -1.902016 |
| 85 | 1 | 0 | 14.720667 | 0.882916  | 0.714206  |
| 86 | 1 | 0 | 13.387278 | 2.042096  | 0.606042  |
| 87 | 1 | 0 | 13.420540 | 0.838734  | 1.915089  |

**Cu<sup>+</sup>(2-Phen)(2-Im)<sub>2</sub>**

|    |    |   |           |          |           |
|----|----|---|-----------|----------|-----------|
| 1  | 29 | 0 | -0.796855 | 0.229335 | -0.037315 |
| 2  | 7  | 0 | 1.003758  | 0.277497 | -1.296719 |
| 3  | 6  | 0 | 2.160315  | 0.335811 | -0.599590 |
| 4  | 6  | 0 | 1.054087  | 0.267343 | -2.621495 |
| 5  | 6  | 0 | 2.069911  | 0.398833 | 0.850911  |
| 6  | 6  | 0 | 3.419718  | 0.340490 | -1.245880 |
| 7  | 1  | 0 | 0.099494  | 0.242359 | -3.140574 |
| 8  | 6  | 0 | 2.255335  | 0.285113 | -3.344268 |
| 9  | 6  | 0 | 3.243125  | 0.416576 | 1.652209  |
| 10 | 7  | 0 | 0.836178  | 0.452954 | 1.395969  |
| 11 | 6  | 0 | 3.446523  | 0.310853 | -2.650519 |
| 12 | 6  | 0 | 4.591175  | 0.368668 | -0.426650 |
| 13 | 1  | 0 | 2.232720  | 0.270113 | -4.428688 |
| 14 | 6  | 0 | 3.084723  | 0.462558 | 3.050163  |
| 15 | 6  | 0 | 4.485315  | 0.395168 | 0.959199  |
| 16 | 6  | 0 | 0.714248  | 0.486870 | 2.715351  |
| 17 | 1  | 0 | 4.403298  | 0.313202 | -3.163416 |
| 18 | 7  | 0 | 5.897109  | 0.365727 | -0.819112 |
| 19 | 6  | 0 | 1.814175  | 0.490506 | 3.583561  |
| 20 | 1  | 0 | 3.952224  | 0.475192 | 3.703251  |
| 21 | 7  | 0 | 5.779855  | 0.407574 | 1.404840  |
| 22 | 1  | 0 | -0.298735 | 0.514715 | 3.107053  |
| 23 | 6  | 0 | 6.600555  | 0.389794 | 0.305757  |

|    |   |   |           |           |           |
|----|---|---|-----------|-----------|-----------|
| 24 | 1 | 0 | 1.656408  | 0.523427  | 4.656133  |
| 25 | 1 | 0 | 6.079573  | 0.438432  | 2.367591  |
| 26 | 6 | 0 | 8.051757  | 0.397374  | 0.380099  |
| 27 | 6 | 0 | 8.802508  | 0.413903  | -0.805815 |
| 28 | 6 | 0 | 8.757037  | 0.388598  | 1.592240  |
| 29 | 6 | 0 | 10.183871 | 0.423893  | -0.789934 |
| 30 | 1 | 0 | 8.276507  | 0.419779  | -1.755753 |
| 31 | 6 | 0 | 10.139994 | 0.398593  | 1.625934  |
| 32 | 1 | 0 | 8.231765  | 0.370188  | 2.543879  |
| 33 | 6 | 0 | 10.900072 | 0.417938  | 0.432135  |
| 34 | 1 | 0 | 10.715966 | 0.437534  | -1.734235 |
| 35 | 1 | 0 | 10.635538 | 0.390035  | 2.589704  |
| 36 | 7 | 0 | 12.265148 | 0.429891  | 0.458328  |
| 37 | 6 | 0 | 12.965166 | 0.423123  | 1.723926  |
| 38 | 6 | 0 | 13.013835 | 0.444437  | -0.779238 |
| 39 | 1 | 0 | 14.039493 | 0.439453  | 1.538869  |
| 40 | 1 | 0 | 12.712953 | 1.301889  | 2.332651  |
| 41 | 1 | 0 | 12.736135 | -0.476271 | 2.311525  |
| 42 | 1 | 0 | 14.080268 | 0.451253  | -0.552216 |
| 43 | 1 | 0 | 12.803594 | -0.442139 | -1.392528 |
| 44 | 1 | 0 | 12.789723 | 1.336251  | -1.379860 |
| 45 | 7 | 0 | -6.890314 | -0.530751 | 3.550434  |
| 46 | 6 | 0 | -7.612771 | -1.617586 | 3.760626  |
| 47 | 6 | 0 | -5.681718 | -0.663579 | 2.972223  |
| 48 | 6 | 0 | -7.197031 | -2.914732 | 3.419686  |
| 49 | 1 | 0 | -8.584704 | -1.466796 | 4.228327  |
| 50 | 6 | 0 | -5.173941 | -1.932433 | 2.584754  |
| 51 | 6 | 0 | -4.879426 | 0.544173  | 2.762517  |
| 52 | 6 | 0 | -5.964421 | -3.071191 | 2.825431  |
| 53 | 1 | 0 | -7.837475 | -3.767192 | 3.621208  |
| 54 | 6 | 0 | -3.892854 | -1.951911 | 1.964752  |
| 55 | 6 | 0 | -3.601536 | 0.465469  | 2.140354  |
| 56 | 7 | 0 | -5.391563 | 1.711749  | 3.197128  |
| 57 | 1 | 0 | -5.610917 | -4.059672 | 2.545777  |
| 58 | 6 | 0 | -3.139432 | -0.820528 | 1.702730  |
| 59 | 7 | 0 | -3.146073 | -2.997728 | 1.495834  |
| 60 | 6 | 0 | -2.856165 | 1.652368  | 2.031953  |
| 61 | 6 | 0 | -4.673316 | 2.811941  | 3.054815  |
| 62 | 7 | 0 | -1.969248 | -1.171851 | 1.062764  |
| 63 | 6 | 0 | -1.991894 | -2.503592 | 0.964950  |
| 64 | 1 | 0 | -3.421133 | -3.968195 | 1.477904  |
| 65 | 6 | 0 | -3.390527 | 2.837606  | 2.487766  |
| 66 | 1 | 0 | -1.863393 | 1.627910  | 1.590309  |
| 67 | 1 | 0 | -5.126423 | 3.734174  | 3.416144  |
| 68 | 6 | 0 | -0.968546 | -3.383826 | 0.422913  |
| 69 | 1 | 0 | -2.838134 | 3.769094  | 2.414821  |
| 70 | 6 | 0 | -0.943728 | -4.752233 | 0.741826  |
| 71 | 6 | 0 | 0.031241  | -2.912977 | -0.438219 |
| 72 | 6 | 0 | 0.012799  | -5.604642 | 0.221341  |
| 73 | 1 | 0 | -1.662926 | -5.172113 | 1.440491  |
| 74 | 6 | 0 | 0.997970  | -3.747988 | -0.965602 |
| 75 | 1 | 0 | 0.048950  | -1.862913 | -0.713991 |
| 76 | 6 | 0 | 1.016365  | -5.129669 | -0.657375 |
| 77 | 1 | 0 | -0.009882 | -6.647966 | 0.513511  |
| 78 | 1 | 0 | 1.740708  | -3.324162 | -1.632080 |
| 79 | 7 | 0 | 1.959688  | -5.964681 | -1.179835 |
| 80 | 6 | 0 | 2.994279  | -5.437817 | -2.043214 |
| 81 | 6 | 0 | 1.951441  | -7.371102 | -0.840672 |
| 82 | 1 | 0 | 3.656582  | -6.249938 | -2.343836 |
| 83 | 1 | 0 | 2.573820  | -4.989017 | -2.952986 |
| 84 | 1 | 0 | 3.600028  | -4.676233 | -1.534030 |

|     |   |   |           |           |           |
|-----|---|---|-----------|-----------|-----------|
| 85  | 1 | 0 | 2.759958  | -7.871995 | -1.373658 |
| 86  | 1 | 0 | 2.101579  | -7.533458 | 0.235381  |
| 87  | 1 | 0 | 1.007341  | -7.850337 | -1.130928 |
| 88  | 6 | 0 | -5.340872 | 6.394071  | -2.341979 |
| 89  | 6 | 0 | -4.363953 | 7.294692  | -1.888255 |
| 90  | 6 | 0 | -2.906447 | 5.615125  | -1.327065 |
| 91  | 6 | 0 | -3.827065 | 4.625232  | -1.764273 |
| 92  | 6 | 0 | -5.067410 | 5.045702  | -2.277939 |
| 93  | 6 | 0 | -1.605276 | 5.220033  | -0.781179 |
| 94  | 6 | 0 | 0.410705  | 5.868997  | 0.103554  |
| 95  | 1 | 0 | 1.053287  | 6.692712  | 0.411775  |
| 96  | 6 | 0 | 0.857829  | 4.545620  | 0.235572  |
| 97  | 6 | 0 | 0.016599  | 3.529875  | -0.163436 |
| 98  | 6 | 0 | -1.250083 | 3.846236  | -0.682443 |
| 99  | 6 | 0 | -2.198565 | 2.867258  | -1.126684 |
| 100 | 6 | 0 | -3.419562 | 3.265928  | -1.642951 |
| 101 | 1 | 0 | -6.285692 | 6.759237  | -2.731122 |
| 102 | 1 | 0 | -4.555694 | 8.365990  | -1.928895 |
| 103 | 1 | 0 | -5.801107 | 4.319530  | -2.616105 |
| 104 | 1 | 0 | 1.842985  | 4.335332  | 0.640053  |
| 105 | 1 | 0 | 0.316842  | 2.489882  | -0.086688 |
| 106 | 7 | 0 | -0.771216 | 6.201187  | -0.386162 |
| 107 | 7 | 0 | -3.192031 | 6.928863  | -1.398211 |
| 108 | 6 | 0 | -3.260044 | 1.056891  | -1.656545 |
| 109 | 7 | 0 | -2.114380 | 1.489797  | -1.127134 |
| 110 | 7 | 0 | -4.070340 | 2.105414  | -1.967653 |
| 111 | 1 | 0 | -4.951743 | 2.022287  | -2.453319 |
| 112 | 6 | 0 | -3.652360 | -0.319221 | -1.911967 |
| 113 | 6 | 0 | -2.703212 | -1.292074 | -2.252393 |
| 114 | 6 | 0 | -4.996078 | -0.717449 | -1.844164 |
| 115 | 6 | 0 | -3.065578 | -2.601401 | -2.507177 |
| 116 | 1 | 0 | -1.656988 | -1.012189 | -2.334613 |
| 117 | 6 | 0 | -5.375687 | -2.024761 | -2.090822 |
| 118 | 1 | 0 | -5.763490 | -0.003141 | -1.555364 |
| 119 | 6 | 0 | -4.418268 | -3.011545 | -2.429701 |
| 120 | 1 | 0 | -2.290440 | -3.312395 | -2.767139 |
| 121 | 1 | 0 | -6.424166 | -2.285301 | -2.005311 |
| 122 | 7 | 0 | -4.782082 | -4.305450 | -2.670115 |
| 123 | 6 | 0 | -6.165435 | -4.705443 | -2.532341 |
| 124 | 6 | 0 | -3.767132 | -5.306709 | -2.918188 |
| 125 | 1 | 0 | -6.259176 | -5.761497 | -2.786964 |
| 126 | 1 | 0 | -6.534573 | -4.566827 | -1.506255 |
| 127 | 1 | 0 | -6.815911 | -4.137885 | -3.209672 |
| 128 | 1 | 0 | -4.248072 | -6.274209 | -3.064719 |
| 129 | 1 | 0 | -3.188283 | -5.078492 | -3.822420 |
| 130 | 1 | 0 | -3.065389 | -5.397211 | -2.076993 |

**Cu<sup>+</sup>(2-Im)<sub>4</sub>**

|    |    |   |           |           |           |
|----|----|---|-----------|-----------|-----------|
| 1  | 29 | 0 | -0.001906 | -0.331626 | -0.002063 |
| 2  | 7  | 0 | -0.628093 | -5.144142 | 3.110116  |
| 3  | 6  | 0 | -1.320053 | -4.006357 | 2.914484  |
| 4  | 6  | 0 | 0.599143  | -5.231235 | 2.628645  |
| 5  | 6  | 0 | -2.666440 | -3.930089 | 3.488643  |
| 6  | 6  | 0 | -0.775319 | -2.907572 | 2.192503  |
| 7  | 1  | 0 | 1.122031  | -6.169861 | 2.805686  |
| 8  | 6  | 0 | 1.238757  | -4.194981 | 1.932554  |
| 9  | 6  | 0 | -3.443322 | -2.752435 | 3.335638  |
| 10 | 7  | 0 | -3.127851 | -4.999621 | 4.163205  |
| 11 | 6  | 0 | 0.542538  | -3.025852 | 1.716814  |
| 12 | 6  | 0 | -1.598632 | -1.745818 | 2.024791  |

|    |   |   |           |           |           |
|----|---|---|-----------|-----------|-----------|
| 13 | 1 | 0 | 2.257803  | -4.318341 | 1.581052  |
| 14 | 6 | 0 | -4.727028 | -2.715195 | 3.908710  |
| 15 | 6 | 0 | -2.857512 | -1.688613 | 2.591799  |
| 16 | 6 | 0 | -4.337250 | -4.937260 | 4.692805  |
| 17 | 1 | 0 | 1.016014  | -2.195518 | 1.197627  |
| 18 | 7 | 0 | -1.349646 | -0.563160 | 1.348601  |
| 19 | 6 | 0 | -5.180677 | -3.818577 | 4.596652  |
| 20 | 1 | 0 | -5.353645 | -1.834047 | 3.807039  |
| 21 | 7 | 0 | -3.350505 | -0.450862 | 2.268030  |
| 22 | 1 | 0 | -4.673528 | -5.822868 | 5.229852  |
| 23 | 6 | 0 | -2.424600 | 0.211817  | 1.531759  |
| 24 | 1 | 0 | -6.164744 | -3.832211 | 5.053319  |
| 25 | 1 | 0 | -4.211739 | -0.039083 | 2.598670  |
| 26 | 6 | 0 | -2.623227 | 1.577603  | 1.084203  |
| 27 | 6 | 0 | -1.563021 | 2.495790  | 1.062969  |
| 28 | 6 | 0 | -3.900900 | 2.037959  | 0.728540  |
| 29 | 6 | 0 | -1.769150 | 3.817289  | 0.710367  |
| 30 | 1 | 0 | -0.569588 | 2.181117  | 1.373456  |
| 31 | 6 | 0 | -4.117160 | 3.352616  | 0.364048  |
| 32 | 1 | 0 | -4.739978 | 1.346986  | 0.700232  |
| 33 | 6 | 0 | -3.055600 | 4.290910  | 0.353114  |
| 34 | 1 | 0 | -0.925610 | 4.495727  | 0.738890  |
| 35 | 1 | 0 | -5.117930 | 3.652927  | 0.077163  |
| 36 | 7 | 0 | -3.265934 | 5.595657  | 0.018777  |
| 37 | 6 | 0 | -4.583350 | 6.036638  | -0.387747 |
| 38 | 6 | 0 | -2.152267 | 6.516472  | -0.050620 |
| 39 | 1 | 0 | -4.556337 | 7.108993  | -0.582040 |
| 40 | 1 | 0 | -4.921307 | 5.532057  | -1.303662 |
| 41 | 1 | 0 | -5.326603 | 5.855651  | 0.398623  |
| 42 | 1 | 0 | -2.523610 | 7.506358  | -0.316660 |
| 43 | 1 | 0 | -1.637762 | 6.599457  | 0.915353  |
| 44 | 1 | 0 | -1.416452 | 6.213956  | -0.809052 |
| 45 | 7 | 0 | 9.396296  | -0.601186 | 0.589603  |
| 46 | 6 | 0 | 10.159639 | 0.403909  | 0.983567  |
| 47 | 6 | 0 | 8.084713  | -0.573672 | 0.893216  |
| 48 | 6 | 0 | 9.686625  | 1.511817  | 1.704447  |
| 49 | 1 | 0 | 11.214082 | 0.341044  | 0.718007  |
| 50 | 6 | 0 | 7.508027  | 0.504777  | 1.623959  |
| 51 | 6 | 0 | 7.250289  | -1.692216 | 0.443166  |
| 52 | 6 | 0 | 8.348001  | 1.560049  | 2.026069  |
| 53 | 1 | 0 | 10.365393 | 2.306151  | 1.997783  |
| 54 | 6 | 0 | 6.111981  | 0.429553  | 1.895054  |
| 55 | 6 | 0 | 5.862479  | -1.714689 | 0.743043  |
| 56 | 7 | 0 | 7.840490  | -2.679141 | -0.260603 |
| 57 | 1 | 0 | 7.946424  | 2.401953  | 2.583524  |
| 58 | 6 | 0 | 5.309294  | -0.628708 | 1.493146  |
| 59 | 7 | 0 | 5.262774  | 1.279725  | 2.554267  |
| 60 | 6 | 0 | 5.096621  | -2.797481 | 0.279150  |
| 61 | 6 | 0 | 7.094502  | -3.687086 | -0.679281 |
| 62 | 7 | 0 | 4.014375  | -0.442124 | 1.893781  |
| 63 | 6 | 0 | 4.012110  | 0.719790  | 2.531398  |
| 64 | 1 | 0 | 5.515039  | 2.130951  | 3.033572  |
| 65 | 6 | 0 | 5.714529  | -3.796939 | -0.440234 |
| 66 | 1 | 0 | 4.031935  | -2.821258 | 0.490983  |
| 67 | 1 | 0 | 7.608399  | -4.463723 | -1.244555 |
| 68 | 6 | 0 | 2.850211  | 1.352417  | 3.138103  |
| 69 | 1 | 0 | 5.158766  | -4.648420 | -0.820146 |
| 70 | 6 | 0 | 1.724414  | 0.585881  | 3.471264  |
| 71 | 6 | 0 | 2.796385  | 2.729197  | 3.396445  |
| 72 | 6 | 0 | 0.605073  | 1.156344  | 4.051192  |
| 73 | 1 | 0 | 1.738711  | -0.482336 | 3.275331  |

|     |   |   |            |           |           |
|-----|---|---|------------|-----------|-----------|
| 74  | 6 | 0 | 1.681027   | 3.316303  | 3.969296  |
| 75  | 1 | 0 | 3.626912   | 3.373453  | 3.117915  |
| 76  | 6 | 0 | 0.552413   | 2.543368  | 4.330602  |
| 77  | 1 | 0 | -0.237012  | 0.516993  | 4.289786  |
| 78  | 1 | 0 | 1.686214   | 4.387726  | 4.132137  |
| 79  | 7 | 0 | -0.541124  | 3.113986  | 4.925948  |
| 80  | 6 | 0 | -0.633314  | 4.554487  | 5.022665  |
| 81  | 6 | 0 | -1.725140  | 2.319719  | 5.168774  |
| 82  | 1 | 0 | -1.562746  | 4.819048  | 5.528264  |
| 83  | 1 | 0 | 0.194546   | 4.967859  | 5.611158  |
| 84  | 1 | 0 | -0.629058  | 5.039601  | 4.034969  |
| 85  | 1 | 0 | -2.457697  | 2.926604  | 5.702618  |
| 86  | 1 | 0 | -2.188715  | 1.960722  | 4.237672  |
| 87  | 1 | 0 | -1.495150  | 1.450236  | 5.795478  |
| 88  | 6 | 0 | 5.183293   | -3.823300 | -4.590266 |
| 89  | 6 | 0 | 4.339946   | -4.942001 | -4.686870 |
| 90  | 6 | 0 | 2.667322   | -3.933791 | -3.486093 |
| 91  | 6 | 0 | 3.443965   | -2.755982 | -3.332950 |
| 92  | 6 | 0 | 4.728600   | -2.719314 | -3.903979 |
| 93  | 6 | 0 | 1.320104   | -4.009619 | -2.913825 |
| 94  | 6 | 0 | -0.599430  | -5.234315 | -2.629556 |
| 95  | 1 | 0 | -1.122018  | -6.173139 | -2.806439 |
| 96  | 6 | 0 | -1.240130  | -4.197402 | -1.935436 |
| 97  | 6 | 0 | -0.544290  | -3.028023 | -1.719824 |
| 98  | 6 | 0 | 0.774254   | -2.910185 | -2.193710 |
| 99  | 6 | 0 | 1.597246   | -1.748241 | -2.025890 |
| 100 | 6 | 0 | 2.856969   | -1.691439 | -2.591068 |
| 101 | 1 | 0 | 6.168103   | -3.837371 | -5.045315 |
| 102 | 1 | 0 | 4.676996   | -5.828048 | -5.222708 |
| 103 | 1 | 0 | 5.355123   | -1.838129 | -3.802035 |
| 104 | 1 | 0 | -2.259683  | -4.320467 | -1.585311 |
| 105 | 1 | 0 | -1.018562  | -2.197168 | -1.202199 |
| 106 | 7 | 0 | 0.628499   | -5.147644 | -3.109330 |
| 107 | 7 | 0 | 3.129731   | -5.003881 | -4.159079 |
| 108 | 6 | 0 | 2.422242   | 0.209918  | -1.533415 |
| 109 | 7 | 0 | 1.347123   | -0.565041 | -1.351145 |
| 110 | 7 | 0 | 3.349322   | -0.453307 | -2.267743 |
| 111 | 1 | 0 | 4.211014   | -0.041722 | -2.597443 |
| 112 | 6 | 0 | 2.619955   | 1.576190  | -1.086881 |
| 113 | 6 | 0 | 1.559686   | 2.494378  | -1.068771 |
| 114 | 6 | 0 | 3.896939   | 2.036996  | -0.729321 |
| 115 | 6 | 0 | 1.765157   | 3.816359  | -0.717546 |
| 116 | 1 | 0 | 0.566828   | 2.179293  | -1.380690 |
| 117 | 6 | 0 | 4.112509   | 3.352138  | -0.366173 |
| 118 | 1 | 0 | 4.735953   | 1.346063  | -0.698500 |
| 119 | 6 | 0 | 3.050948   | 4.290476  | -0.358587 |
| 120 | 1 | 0 | 0.921666   | 4.494754  | -0.748561 |
| 121 | 1 | 0 | 5.112743   | 3.652831  | -0.077819 |
| 122 | 6 | 0 | -9.683754  | 1.509181  | -1.700854 |
| 123 | 6 | 0 | -10.156718 | 0.401885  | -0.979001 |
| 124 | 6 | 0 | -8.082040  | -0.576263 | -0.889106 |
| 125 | 6 | 0 | -7.505420  | 0.501544  | -1.620829 |
| 126 | 6 | 0 | -8.345283  | 1.556802  | -2.023204 |
| 127 | 6 | 0 | -7.247696  | -1.694757 | -0.438787 |
| 128 | 6 | 0 | -7.091977  | -3.689029 | 0.684739  |
| 129 | 1 | 0 | -7.605840  | -4.465189 | 1.250699  |
| 130 | 6 | 0 | -5.712152  | -3.799418 | 0.445117  |
| 131 | 6 | 0 | -5.094284  | -2.800550 | -0.275119 |
| 132 | 6 | 0 | -5.860015  | -1.717772 | -0.739262 |
| 133 | 6 | 0 | -5.306861  | -0.632364 | -1.490238 |
| 134 | 6 | 0 | -6.109521  | 0.425781  | -1.892516 |

|     |   |   |            |           |           |
|-----|---|---|------------|-----------|-----------|
| 135 | 1 | 0 | -10.362439 | 2.303526  | -1.994351 |
| 136 | 1 | 0 | -11.211039 | 0.339516  | -0.712840 |
| 137 | 1 | 0 | -7.943742  | 2.398215  | -2.581426 |
| 138 | 1 | 0 | -5.156462  | -4.650853 | 0.825242  |
| 139 | 1 | 0 | -4.029715  | -2.824797 | -0.487449 |
| 140 | 7 | 0 | -7.837864  | -2.681116 | 0.265807  |
| 141 | 7 | 0 | -9.393472  | -0.603185 | -0.584786 |
| 142 | 6 | 0 | -4.009848  | 0.715346  | -2.529716 |
| 143 | 7 | 0 | -4.012008  | -0.446178 | -1.891377 |
| 144 | 7 | 0 | -5.260440  | 1.275400  | -2.552552 |
| 145 | 1 | 0 | -5.512691  | 2.126417  | -3.032240 |
| 146 | 6 | 0 | -2.848253  | 1.347679  | -3.137361 |
| 147 | 6 | 0 | -2.793740  | 2.724779  | -3.393884 |
| 148 | 6 | 0 | -1.723674  | 0.580678  | -3.473524 |
| 149 | 6 | 0 | -1.678859  | 3.311794  | -3.967758 |
| 150 | 1 | 0 | -3.623254  | 3.369281  | -3.112929 |
| 151 | 6 | 0 | -0.604846  | 1.151047  | -4.054555 |
| 152 | 1 | 0 | -1.738527  | -0.487827 | -3.279217 |
| 153 | 6 | 0 | -0.551447  | 2.538446  | -4.331937 |
| 154 | 1 | 0 | -1.683444  | 4.383444  | -4.129148 |
| 155 | 1 | 0 | 0.236283   | 0.511330  | -4.295515 |
| 156 | 7 | 0 | 3.260745   | 5.595691  | -0.025821 |
| 157 | 6 | 0 | 2.147317   | 6.517141  | 0.038585  |
| 158 | 6 | 0 | 4.577619   | 6.037315  | 0.381733  |
| 159 | 1 | 0 | 2.518437   | 7.507544  | 0.303007  |
| 160 | 1 | 0 | 1.635090   | 6.597878  | -0.928798 |
| 161 | 1 | 0 | 1.409618   | 6.216889  | 0.796062  |
| 162 | 1 | 0 | 4.550153   | 7.109797  | 0.575228  |
| 163 | 1 | 0 | 4.914590   | 5.533512  | 1.298418  |
| 164 | 1 | 0 | 5.321845   | 5.855832  | -0.403630 |
| 165 | 7 | 0 | 0.541711   | 3.109061  | -4.927909 |
| 166 | 6 | 0 | 0.634656   | 4.549591  | -5.023282 |
| 167 | 6 | 0 | 1.724389   | 2.313980  | -5.174475 |
| 168 | 1 | 0 | 1.564026   | 4.814142  | -5.528995 |
| 169 | 1 | 0 | -0.193248  | 4.964079  | -5.610966 |
| 170 | 1 | 0 | 0.631138   | 5.033688  | -4.035093 |
| 171 | 1 | 0 | 2.456867   | 2.921254  | -5.707973 |
| 172 | 1 | 0 | 2.188941   | 1.952250  | -4.244915 |
| 173 | 1 | 0 | 1.492440   | 1.446203  | -5.802836 |
